# Supplementary material for: Enhanced crystallinity and thermal stability of Ba2+ and Al3+–O2− co-substituted Sr2Si5N8:Eu2+
Source: Royal Society of Chemistry journal article supplement (doi:10.1039/d0tc00965b), 2020-01-01
Supplement: d0tc00965b1.pdf [file d0tc00965b1.pdf]

## Supporting Information

### Enhanced crystallinity and thermal stability of Ba<sup>2+</sup> and Al<sup>3+</sup>-O<sup>2-</sup> co-substituted Sr<sub>2</sub>Si<sub>5</sub>N<sub>8</sub>:Eu<sup>2+</sup>

Zebin Li, Takatoshi Seto\* and Yuhua Wang\*

Key Laboratory for Special Function Materials and Structural Design of the Ministry of Education,

National & local Joint Engineering Laboratory for Optical Conversion Materials and Technology,

School of Physical Science and Technology, Lanzhou University, Lanzhou, 730000, China.

E-mail: seto@lzu.edu.cn; wyh@lzu.edu.cn;

**Figure S1** The SEM micrographs of x=0,0.3,0.6 in three series: Ba-AIO-258, Ca-AIO-258 and AIO-258

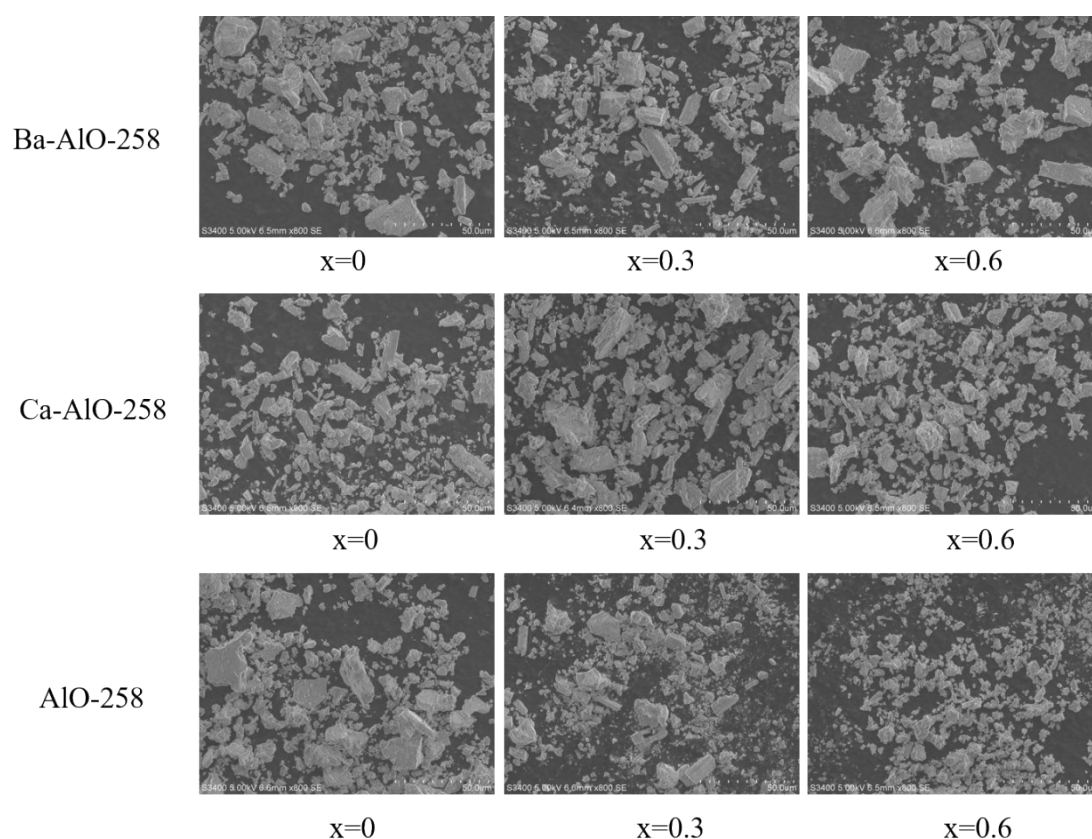

**Figure S2** Rietveld refinement of Ba-AIO-258: (Sr<sub>1.7</sub>Ba<sub>0.3</sub>Si<sub>5-x</sub>Al<sub>x</sub>N<sub>8-x</sub>O<sub>x</sub>:0.05Eu) : (a-d) x=0, 0.3, 0.6, 0.9, Black crosses: measured diffractogram; bottom blue line: difference profile; red line: calculated diffractogram; olive green, orange and violet bars: positions of the diffraction

peak.

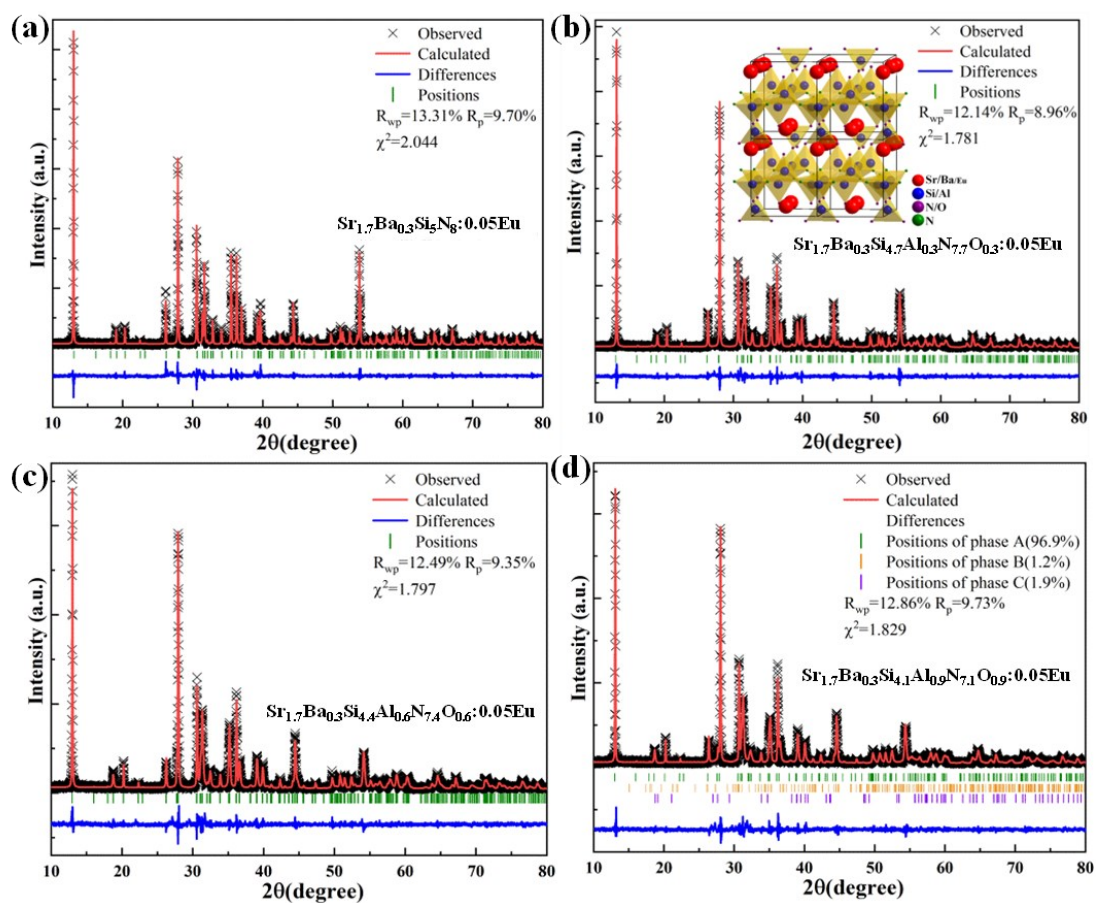

**Figure S3** Rietveld refinement of Ca-ALO-258:  $(\text{Sr}_{1.7}\text{Ca}_{0.3}\text{Si}_{5-x}\text{Al}_x\text{N}_{8-x}\text{O}_x \cdot 0.05\text{Eu})$ : (a-d)  $x=0, 0.3, 0.6, 0.9$ , Black crosses: measured diffractogram; bottom blue line: difference profile; red line: calculated diffractogram; olive green, orange and violet bars: positions of the diffraction peak.

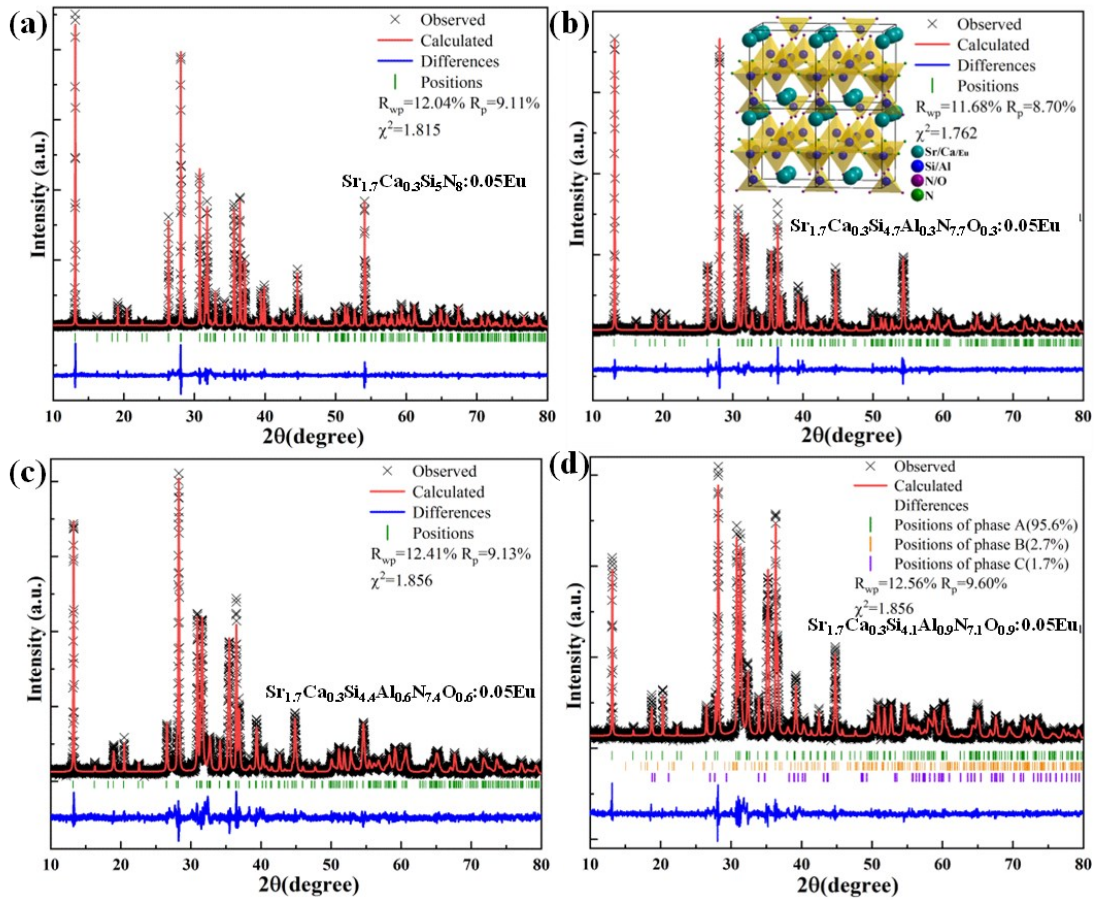

**Figure S4** Rietveld refinement of AlO-258 ( $\text{Sr}_2\text{Si}_{5-x}\text{Al}_x\text{N}_{8-x}\text{O}_x:0.05\text{Eu}$ ) : (a-d)  $x=0, 0.3, 0.6, 0.9$ , Black crosses: measured diffractogram; bottom blue line: difference profile; red line:

calculated diffractogram; olive green, orange and violet bars: positions of the diffraction peak.

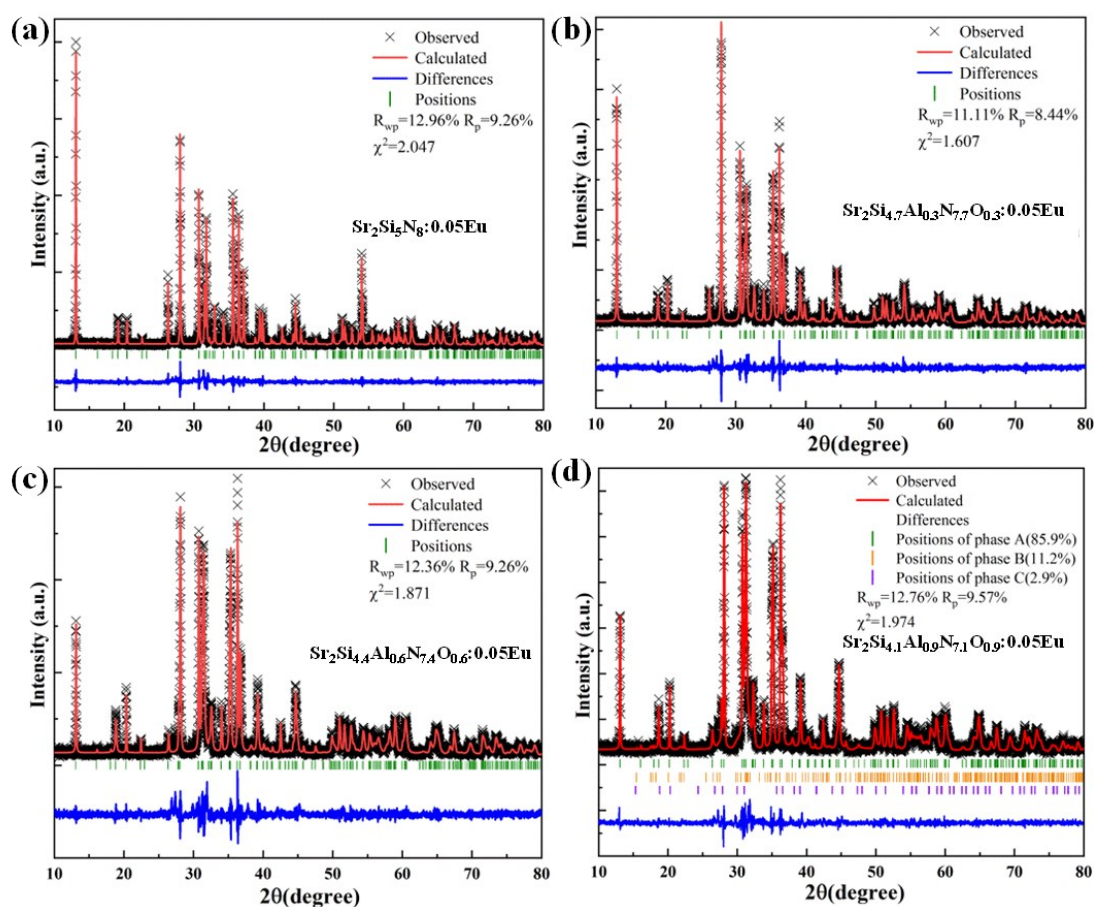

**Table S1** The detailed crystal datum of all samples of the three series in the paper from the Rietveld refinement.

|                        |                                                                            |            |            |                          |              |              |
|------------------------|----------------------------------------------------------------------------|------------|------------|--------------------------|--------------|--------------|
| <b>Formula sum</b>     | Sr <sub>1.7</sub> Ba <sub>0.3</sub> Si <sub>5</sub> N <sub>8</sub> :0.05Eu |            |            |                          |              |              |
| <b>Formula weight</b>  | 445.48 g/mol                                                               |            |            |                          |              |              |
| <b>Crystal system</b>  | orthorhombic                                                               |            |            |                          |              |              |
| <b>Space-group</b>     | P m n 21 (31)                                                              |            |            |                          |              |              |
| <b>Cell parameters</b> | a=5.6974(1) Å b=6.8127(0) Å c=9.3089(1) Å                                  |            |            |                          |              |              |
| <b>Cell ratio</b>      | a/b=0.8363 b/c=0.7319 c/a=1.6339                                           |            |            |                          |              |              |
| <b>Cell volume</b>     | 361.32(1) Å <sup>3</sup>                                                   |            |            |                          |              |              |
| <b>Z</b>               | 2                                                                          |            |            |                          |              |              |
| <b>Atom</b>            | <b>x/a</b>                                                                 | <b>y/b</b> | <b>z/c</b> | <b>U [Å<sup>2</sup>]</b> | <b>Wyck.</b> | <b>Frac.</b> |
| Sr1                    | 0                                                                          | 0.87032    | 0.99865    | 0.0088                   | 2a           | 0.84981      |
| Sr2                    | 0                                                                          | 0.88247    | 0.36711    | 0.0324                   | 2a           | 0.80769      |
| Si1                    | 0.24826                                                                    | 0.33231    | 0.1829     | 0.0198                   | 4b           | 1            |
| Si2                    | 0                                                                          | 0.05489    | 0.67753    | 0.0214                   | 2a           | 1            |
| Si3                    | 0                                                                          | 0.40179    | 0.90189    | 0.0021                   | 2a           | 1            |
| Si4                    | 0                                                                          | 0.41979    | 0.46112    | 0.0032                   | 2a           | 1            |
| N1                     | 0.24781                                                                    | 0.91352    | 0.67179    | 0.0039                   | 4b           | 1            |
| N2                     | 0.24941                                                                    | 0.44384    | 0.01098    | 0.0022                   | 4b           | 1            |
| N3                     | 0                                                                          | 0.17423    | 0.83842    | 0.0023                   | 2a           | 1            |
| N4                     | 0                                                                          | 0.19029    | 0.52193    | 0.0032                   | 2a           | 1            |
| N5                     | 0                                                                          | 0.42502    | 0.2718     | 0.0072                   | 2a           | 1            |

|     |   |         |         |        |    |         |
|-----|---|---------|---------|--------|----|---------|
| N6  | 0 | 0.58632 | 0.77327 | 0.0049 | 2a | 1       |
| Eu1 | 0 | 0.87032 | 0.99865 | 0.0088 | 2a | 0.025   |
| Eu2 | 0 | 0.88247 | 0.36711 | 0.0324 | 2a | 0.025   |
| Ba1 | 0 | 0.87032 | 0.99865 | 0.0088 | 2a | 0.12519 |
| Ba2 | 0 | 0.88247 | 0.36711 | 0.0324 | 2a | 0.16731 |

|                        |                                                                                                                   |  |  |  |  |  |
|------------------------|-------------------------------------------------------------------------------------------------------------------|--|--|--|--|--|
| <b>Formula sum</b>     | Sr <sub>1.7</sub> Ba <sub>0.3</sub> Si <sub>4.7</sub> Al <sub>0.3</sub> N <sub>7.7</sub> O <sub>0.3</sub> :0.05Eu |  |  |  |  |  |
| <b>Formula weight</b>  | 445.74 g/mol                                                                                                      |  |  |  |  |  |
| <b>Crystal system</b>  | orthorhombic                                                                                                      |  |  |  |  |  |
| <b>Space-group</b>     | P m n 21 (31)                                                                                                     |  |  |  |  |  |
| <b>Cell parameters</b> | a=5.7178(2) Å b=6.7894(1) Å c=9.3654(2) Å                                                                         |  |  |  |  |  |
| <b>Cell ratio</b>      | a/b=0.8422 b/c=0.7249 c/a=1.6379                                                                                  |  |  |  |  |  |
| <b>Cell volume</b>     | 363.56(1) Å <sup>3</sup>                                                                                          |  |  |  |  |  |
| <b>Z</b>               | 8                                                                                                                 |  |  |  |  |  |

| Atom | x/a     | y/b     | z/c     | U [Å <sup>2</sup> ] | Wyck. | Frac.   |
|------|---------|---------|---------|---------------------|-------|---------|
| Sr1  | 0       | 0.8687  | 1.00074 | 0.0069              | 2a    | 0.83126 |
| Sr2  | 0       | 0.88298 | 0.36779 | 0.0231              | 2a    | 0.82624 |
| Ba1  | 0       | 0.8687  | 1.00074 | 0.0069              | 2a    | 0.14374 |
| Ba2  | 0       | 0.88298 | 0.36779 | 0.0231              | 2a    | 0.14876 |
| Si1  | 0.24636 | 0.33652 | 0.19182 | 0.0141              | 4b    | 0.94    |
| Si2  | 0       | 0.0591  | 0.68762 | 0.0291              | 2a    | 0.94    |
| Si3  | 0       | 0.40463 | 0.90282 | 0.0032              | 2a    | 0.94    |
| Si4  | 0       | 0.42151 | 0.46116 | 0.0015              | 2a    | 0.94    |
| N1   | 0.24194 | 0.9094  | 0.67734 | 0.0066              | 4b    | 0.925   |
| N2   | 0.25017 | 0.44872 | 0.0086  | 0.0049              | 4b    | 1       |
| N3   | 0       | 0.17965 | 0.83145 | 0.0005              | 2a    | 0.925   |
| N4   | 0       | 0.19363 | 0.52104 | 0.0013              | 2a    | 0.925   |
| N5   | 0       | 0.4247  | 0.27274 | 0.0018              | 2a    | 1       |
| N6   | 0       | 0.58227 | 0.75835 | 0.0012              | 2a    | 1       |
| Eu1  | 0       | 0.8687  | 1.00074 | 0.0069              | 2a    | 0.025   |
| Eu2  | 0       | 0.88298 | 0.36779 | 0.0231              | 2a    | 0.025   |
| Al1  | 0.24636 | 0.33652 | 0.19182 | 0.0141              | 4b    | 0.06    |
| Al2  | 0       | 0.0591  | 0.68762 | 0.0291              | 2a    | 0.06    |
| Al3  | 0       | 0.40463 | 0.90282 | 0.0032              | 2a    | 0.06    |
| Al4  | 0       | 0.42151 | 0.46116 | 0.0015              | 2a    | 0.06    |
| O1   | 0.24194 | 0.9094  | 0.67734 | 0.0066              | 4b    | 0.075   |
| O3   | 0       | 0.17965 | 0.83145 | 0.0005              | 2a    | 0.075   |
| O4   | 0       | 0.19363 | 0.52104 | 0.0013              | 2a    | 0.075   |

|                        |                                                                                                                   |  |  |  |  |  |
|------------------------|-------------------------------------------------------------------------------------------------------------------|--|--|--|--|--|
| <b>Formula sum</b>     | Sr <sub>1.7</sub> Ba <sub>0.3</sub> Si <sub>4.4</sub> Al <sub>0.6</sub> N <sub>7.4</sub> O <sub>0.6</sub> :0.05Eu |  |  |  |  |  |
| <b>Formula weight</b>  | 446.01 g/mol                                                                                                      |  |  |  |  |  |
| <b>Crystal system</b>  | orthorhombic                                                                                                      |  |  |  |  |  |
| <b>Space-group</b>     | P m n 21 (31)                                                                                                     |  |  |  |  |  |
| <b>Cell parameters</b> | a=5.7391(2) Å b=6.7731(1) Å c=9.4188(3) Å                                                                         |  |  |  |  |  |
| <b>Cell ratio</b>      | a/b=0.8473 b/c=0.7191 c/a=1.6412                                                                                  |  |  |  |  |  |
| <b>Cell volume</b>     | 366.12(2) Å <sup>3</sup>                                                                                          |  |  |  |  |  |
| <b>Z</b>               | 8                                                                                                                 |  |  |  |  |  |

| Atom | x/a        | y/b        | z/c         | U [Å <sup>2</sup> ] | Wyck. | Frac.   |
|------|------------|------------|-------------|---------------------|-------|---------|
| Sr1  | 0          | 0.87041    | 1.00096     | 0.0153              | 2a    | 0.82875 |
| Sr2  | 0          | 0.88296    | 0.36763     | 0.0159              | 2a    | 0.82875 |
| Si1  | 0.24781    | 0.33136    | 0.18401     | 0.0173              | 4b    | 0.88    |
| Si2  | 0          | 0.05555    | 0.68001     | 0.0077              | 2a    | 0.88    |
| Si3  | 0          | 0.40376    | 0.90187     | 0.0335              | 2a    | 0.88    |
| Si4  | 0          | 0.42133    | 0.4613      | 0.0073              | 2a    | 0.88    |
| N1   | 0.2242(25) | 0.9128(8)  | 0.674(4)    | 0.0149              | 4b    | 0.85    |
| N2   | 0.245(4)   | 0.4541(11) | -0.0017(20) | 0.0024              | 4b    | 1       |
| N3   | 0          | 0.1896(15) | 0.8157(21)  | 0.0019              | 2a    | 0.85    |
| N4   | 0          | 0.1950(15) | 0.5160(26)  | 0.0043              | 2a    | 0.85    |
| N5   | 0          | 0.42612    | 0.27092     | 0.0105              | 2a    | 1       |
| N6   | 0          | 0.58727    | 0.77039     | 0.0393              | 2a    | 1       |
| Eu1  | 0          | 0.87041    | 1.00096     | 0.0153              | 2a    | 0.025   |
| Eu2  | 0          | 0.88296    | 0.36763     | 0.1059              | 2a    | 0.025   |
| Al1  | 0.24781    | 0.33136    | 0.18401     | 0.0173              | 4b    | 0.12    |
| Al2  | 0          | 0.05555    | 0.68001     | 0.0077              | 2a    | 0.12    |
| Al3  | 0          | 0.40376    | 0.90187     | 0.0335              | 2a    | 0.12    |
| Al4  | 0          | 0.42133    | 0.4613      | 0.0073              | 2a    | 0.12    |
| O1   | 0.2242(25) | 0.9128(8)  | 0.674(4)    | 0.0149              | 4b    | 0.15    |
| O3   | 0          | 0.1896(15) | 0.8157(21)  | 0.0019              | 2a    | 0.15    |
| O4   | 0          | 0.1950(15) | 0.5160(26)  | 0.0043              | 2a    | 0.15    |
| Ba1  | 0          | 0.87041    | 1.00096     | 0.0153              | 2a    | 0.14625 |
| Ba2  | 0          | 0.88296    | 0.36763     | 0.0159              | 2a    | 0.14625 |

|                        |                                                                                                                   |  |  |  |  |  |
|------------------------|-------------------------------------------------------------------------------------------------------------------|--|--|--|--|--|
| <b>Formula sum</b>     | Sr <sub>1.7</sub> Ba <sub>0.3</sub> Si <sub>4.1</sub> Al <sub>0.9</sub> N <sub>7.1</sub> O <sub>0.9</sub> :0.05Eu |  |  |  |  |  |
| <b>Formula weight</b>  | 446.28/mol                                                                                                        |  |  |  |  |  |
| <b>Crystal system</b>  | orthorhombic                                                                                                      |  |  |  |  |  |
| <b>Space-group</b>     | P m n 21 (31)                                                                                                     |  |  |  |  |  |
| <b>Cell parameters</b> | a=5.7658(2) Å b=6.7608(1) Å c=9.4855(3) Å                                                                         |  |  |  |  |  |
| <b>Cell ratio</b>      | a/b=0.8528 b/c=0.7128 c/a=1.6451                                                                                  |  |  |  |  |  |
| <b>Cell volume</b>     | 369.76(2) Å <sup>3</sup>                                                                                          |  |  |  |  |  |
| <b>Z</b>               | 8                                                                                                                 |  |  |  |  |  |

| Atom | x/a     | y/b     | z/c     | U [Å <sup>2</sup> ] | Wyck. | Frac.   |
|------|---------|---------|---------|---------------------|-------|---------|
| Sr1  | 0       | 0.87234 | 0.99998 | 0.0078              | 2a    | 0.82875 |
| Sr2  | 0       | 0.88348 | 0.36812 | 0.0109              | 2a    | 0.82875 |
| Si1  | 0.24835 | 0.33205 | 0.18505 | 0.0135              | 4b    | 0.82    |
| Si2  | 0       | 0.05632 | 0.67705 | 0.0231              | 2a    | 0.82    |
| Si3  | 0       | 0.40261 | 0.90255 | 0.0112              | 2a    | 0.82    |
| Si4  | 0       | 0.42051 | 0.46163 | 0.0061              | 2a    | 0.82    |
| N1   | 0.23955 | 0.9039  | 0.66117 | 0.0159              | 4b    | 0.775   |
| N2   | 0.24903 | 0.4479  | 0.01276 | 0.0072              | 4b    | 1       |
| N3   | 0       | 0.18    | 0.84074 | 0.0043              | 2a    | 0.775   |
| N4   | 0       | 0.18721 | 0.51989 | 0.0003              | 2a    | 0.775   |
| N5   | 0       | 0.42742 | 0.26607 | 0.004               | 2a    | 1       |
| N6   | 0       | 0.58152 | 0.7719  | 0.0278              | 2a    | 1       |
| Eu1  | 0       | 0.87234 | 0.99998 | 0.0078              | 2a    | 0.025   |

|     |         |         |         |        |    |         |
|-----|---------|---------|---------|--------|----|---------|
| Eu2 | 0       | 0.88348 | 0.36812 | 0.0109 | 2a | 0.025   |
| Al1 | 0.24835 | 0.33205 | 0.18505 | 0.0135 | 4b | 0.18    |
| Al2 | 0       | 0.05632 | 0.67705 | 0.0231 | 2a | 0.18    |
| Al3 | 0       | 0.40261 | 0.90255 | 0.0112 | 2a | 0.18    |
| Al4 | 0       | 0.42051 | 0.46163 | 0.0061 | 2a | 0.18    |
| O1  | 0.23955 | 0.9039  | 0.66117 | 0.0159 | 4b | 0.225   |
| O3  | 0       | 0.18    | 0.84074 | 0.0043 | 2a | 0.225   |
| O4  | 0       | 0.18721 | 0.51989 | 0.0003 | 2a | 0.225   |
| Ba1 | 0       | 0.87234 | 0.99998 | 0.0078 | 2a | 0.14625 |
| Ba2 | 0       | 0.88348 | 0.36812 | 0.0109 | 2a | 0.14625 |

|                        |                                                                            |
|------------------------|----------------------------------------------------------------------------|
| <b>Formula sum</b>     | Sr <sub>1.7</sub> Ca <sub>0.3</sub> Si <sub>5</sub> N <sub>8</sub> :0.05Eu |
| <b>Formula weight</b>  | 417.03g/mol                                                                |
| <b>Crystal system</b>  | orthorhombic                                                               |
| <b>Space-group</b>     | P m n 21 (31)                                                              |
| <b>Cell parameters</b> | a=5.6838(1) Å b=6.785() Å c=9.2971(1) Å                                    |
| <b>Cell ratio</b>      | a/b=0.8377 b/c=0.7298 c/a=1.6357                                           |
| <b>Cell volume</b>     | 358.54(0) Å <sup>3</sup>                                                   |
| <b>Z</b>               | 2                                                                          |

| Atom | x/a     | y/b     | z/c     | U [Å <sup>2</sup> ] | Wyck. | Frac.   |
|------|---------|---------|---------|---------------------|-------|---------|
| Sr1  | 0       | 0.87344 | 0.99973 | 0.0152              | 2a    | 0.84419 |
| Sr2  | 0       | 0.8849  | 0.3683  | 0.0127              | 2a    | 0.81331 |
| Si1  | 0.24832 | 0.33299 | 0.18382 | 0.0173              | 4b    | 1       |
| Si2  | 0       | 0.05339 | 0.67507 | 0.0079              | 2a    | 1       |
| Si3  | 0       | 0.40642 | 0.90267 | 0.0144              | 2a    | 1       |
| Si4  | 0       | 0.42288 | 0.46074 | 0.0045              | 2a    | 1       |
| N1   | 0.24632 | 0.91324 | 0.67487 | 0.0119              | 4b    | 1       |
| N2   | 0.25561 | 0.44555 | 0.01239 | 0.0009              | 4b    | 1       |
| N3   | 0       | 0.17436 | 0.83978 | 0.0068              | 2a    | 1       |
| N4   | 0       | 0.1885  | 0.52127 | 0.0091              | 2a    | 1       |
| N5   | 0       | 0.42549 | 0.27339 | 0.001               | 2a    | 1       |
| N6   | 0       | 0.58482 | 0.77147 | 0.01                | 2a    | 1       |
| Eu1  | 0       | 0.87344 | 0.99973 | 0.0152              | 2a    | 0.025   |
| Eu2  | 0       | 0.8849  | 0.3683  | 0.0127              | 2a    | 0.025   |
| Ca1  | 0       | 0.87344 | 0.99973 | 0.0152              | 2a    | 0.13081 |
| Ca2  | 0       | 0.8849  | 0.3683  | 0.0127              | 2a    | 0.16169 |

| <b>Formula sum</b>     | Sr <sub>1.7</sub> Ca <sub>0.3</sub> Si <sub>4.7</sub> Al <sub>0.3</sub> N <sub>7.7</sub> O <sub>0.3</sub> :0.05Eu |         |         |                     |       |         |
|------------------------|-------------------------------------------------------------------------------------------------------------------|---------|---------|---------------------|-------|---------|
| <b>Formula weight</b>  | 417.30 g/mol                                                                                                      |         |         |                     |       |         |
| <b>Crystal system</b>  | orthorhombic                                                                                                      |         |         |                     |       |         |
| <b>Space-group</b>     | P m n 21 (31)                                                                                                     |         |         |                     |       |         |
| <b>Cell parameters</b> | a=5.7014(1) Å b=6.7575(1) Å c=9.3525(2) Å                                                                         |         |         |                     |       |         |
| <b>Cell ratio</b>      | a/b=0.8437 b/c=0.7225 c/a=1.6404                                                                                  |         |         |                     |       |         |
| <b>Cell volume</b>     | 360.33(1) Å <sup>3</sup>                                                                                          |         |         |                     |       |         |
| <b>Z</b>               | 8                                                                                                                 |         |         |                     |       |         |
| Atom                   | x/a                                                                                                               | y/b     | z/c     | U [Å <sup>2</sup> ] | Wyck. | Frac.   |
| Sr1                    | 0                                                                                                                 | 0.87199 | 1.00011 | 0.01                | 2a    | 0.82875 |

|     |         |         |         |        |    |         |
|-----|---------|---------|---------|--------|----|---------|
| Sr2 | 0       | 0.88287 | 0.36803 | 0.0137 | 2a | 0.82875 |
| Ca1 | 0       | 0.87199 | 1.00011 | 0.01   | 2a | 0.14625 |
| Ca2 | 0       | 0.88287 | 0.36803 | 0.0137 | 2a | 0.14625 |
| Si1 | 0.24719 | 0.33327 | 0.18394 | 0.0144 | 4b | 0.94    |
| Si2 | 0       | 0.05561 | 0.67689 | 0.0197 | 2a | 0.94    |
| Si3 | 0       | 0.40452 | 0.90225 | 0.0092 | 2a | 0.94    |
| Si4 | 0       | 0.42207 | 0.4611  | 0.0009 | 2a | 0.94    |
| N1  | 0.24682 | 0.91221 | 0.67246 | 0.009  | 4b | 0.925   |
| N2  | 0.2535  | 0.44527 | 0.01091 | 0.0046 | 4b | 1       |
| N3  | 0       | 0.17524 | 0.83939 | 0.0037 | 2a | 0.925   |
| N4  | 0       | 0.18999 | 0.52081 | 0.0001 | 2a | 0.925   |
| N5  | 0       | 0.42615 | 0.27166 | 0.0021 | 2a | 1       |
| N6  | 0       | 0.58518 | 0.77176 | 0.0013 | 2a | 1       |
| Eu1 | 0       | 0.87199 | 1.00011 | 0.01   | 2a | 0.025   |
| Eu2 | 0       | 0.88287 | 0.36803 | 0.0137 | 2a | 0.025   |
| Al1 | 0.24719 | 0.33327 | 0.18394 | 0.0144 | 4b | 0.06    |
| Al2 | 0       | 0.05561 | 0.67689 | 0.0197 | 2a | 0.06    |
| Al3 | 0       | 0.40452 | 0.90225 | 0.0092 | 2a | 0.06    |
| Al4 | 0       | 0.42207 | 0.4611  | 0.0009 | 2a | 0.06    |
| O1  | 0.24682 | 0.91221 | 0.67246 | 0.009  | 4b | 0.075   |
| O3  | 0       | 0.17524 | 0.83939 | 0.0037 | 2a | 0.075   |
| O4  | 0       | 0.18999 | 0.52081 | 0.0001 | 2a | 0.075   |

|                        |                                                                                                                   |            |            |                          |              |              |
|------------------------|-------------------------------------------------------------------------------------------------------------------|------------|------------|--------------------------|--------------|--------------|
| <b>Formula sum</b>     | Sr <sub>1.7</sub> Ca <sub>0.3</sub> Si <sub>4.4</sub> Al <sub>0.6</sub> N <sub>7.4</sub> O <sub>0.6</sub> :0.05Eu |            |            |                          |              |              |
| <b>Formula weight</b>  | 417.57 g/mol                                                                                                      |            |            |                          |              |              |
| <b>Crystal system</b>  | orthorhombic                                                                                                      |            |            |                          |              |              |
| <b>Space-group</b>     | P m n 21 (31)                                                                                                     |            |            |                          |              |              |
| <b>Cell parameters</b> | a=5.7235(2) Å b=6.7362(1) Å c=9.4049(3) Å                                                                         |            |            |                          |              |              |
| <b>Cell ratio</b>      | a/b=0.8497 b/c=0.7162 c/a=1.6432                                                                                  |            |            |                          |              |              |
| <b>Cell volume</b>     | 362.60(2) Å <sup>3</sup>                                                                                          |            |            |                          |              |              |
| <b>Z</b>               | 8                                                                                                                 |            |            |                          |              |              |
| <b>Atom</b>            | <b>x/a</b>                                                                                                        | <b>y/b</b> | <b>z/c</b> | <b>U [Å<sup>2</sup>]</b> | <b>Wyck.</b> | <b>Frac.</b> |
| Sr1                    | 0                                                                                                                 | 0.87282    | 0.99964    | 0.0111                   | 2a           | 0.82875      |
| Sr2                    | 0                                                                                                                 | 0.88422    | 0.36835    | 0.0113                   | 2a           | 0.82875      |
| Si1                    | 0.24772                                                                                                           | 0.33223    | 0.18448    | 0.0114                   | 4b           | 0.88         |
| Si2                    | 0                                                                                                                 | 0.05439    | 0.67854    | 0.0109                   | 2a           | 0.88         |
| Si3                    | 0                                                                                                                 | 0.40367    | 0.90206    | 0.0122                   | 2a           | 0.88         |
| Si4                    | 0                                                                                                                 | 0.42219    | 0.46096    | 0.0035                   | 2a           | 0.88         |
| N1                     | 0.24573                                                                                                           | 0.91293    | 0.6744     | 0.0083                   | 4b           | 0.85         |
| N2                     | 0.25182                                                                                                           | 0.44536    | 0.01176    | 0.002                    | 4b           | 1            |
| N3                     | 0                                                                                                                 | 0.17562    | 0.84001    | 0.0039                   | 2a           | 0.85         |
| N4                     | 0                                                                                                                 | 0.18993    | 0.52003    | 0.0025                   | 2a           | 0.85         |
| N5                     | 0                                                                                                                 | 0.42676    | 0.27174    | 0.0081                   | 2a           | 1            |
| N6                     | 0                                                                                                                 | 0.58463    | 0.77093    | 0.0169                   | 2a           | 1            |
| Eu1                    | 0                                                                                                                 | 0.87282    | 0.99964    | 0.0111                   | 2a           | 0.025        |
| Eu2                    | 0                                                                                                                 | 0.88422    | 0.36835    | 0.0113                   | 2a           | 0.025        |
| Al1                    | 0.24772                                                                                                           | 0.33223    | 0.18448    | 0.0114                   | 4b           | 0.12         |



|     |         |         |         |        |    |         |
|-----|---------|---------|---------|--------|----|---------|
| Al2 | 0       | 0.05439 | 0.67854 | 0.0109 | 2a | 0.12    |
| Al3 | 0       | 0.40367 | 0.90206 | 0.0122 | 2a | 0.12    |
| Al4 | 0       | 0.42219 | 0.46096 | 0.0035 | 2a | 0.12    |
| O1  | 0.24573 | 0.91293 | 0.6744  | 0.0083 | 4b | 0.15    |
| O3  | 0       | 0.17562 | 0.84001 | 0.0039 | 2a | 0.15    |
| O4  | 0       | 0.18993 | 0.52003 | 0.0025 | 2a | 0.15    |
| Ca1 | 0       | 0.87282 | 0.99964 | 0.0111 | 2a | 0.14625 |
| Ca2 | 0       | 0.88422 | 0.36835 | 0.0113 | 2a | 0.14625 |

|                        |                                                                                                                   |
|------------------------|-------------------------------------------------------------------------------------------------------------------|
| <b>Formula sum</b>     | Sr <sub>1.7</sub> Ca <sub>0.3</sub> Si <sub>4.1</sub> Al <sub>0.9</sub> N <sub>7.1</sub> O <sub>0.9</sub> :0.05Eu |
| <b>Formula weight</b>  | 417.83 g/mol                                                                                                      |
| <b>Crystal system</b>  | orthorhombic                                                                                                      |
| <b>Space-group</b>     | P m n 21 (31)                                                                                                     |
| <b>Cell parameters</b> | a=5.7452(2) Å b=6.7180(1) Å c=9.4542(3) Å                                                                         |
| <b>Cell ratio</b>      | a/b=0.8552 b/c=0.7106 c/a=1.6456                                                                                  |
| <b>Cell volume</b>     | 364.90(2) Å <sup>3</sup>                                                                                          |
| <b>Z</b>               | 8                                                                                                                 |

| Atom | x/a        | y/b        | z/c        | U [Å <sup>2</sup> ] | Wyck. | Frac.   |
|------|------------|------------|------------|---------------------|-------|---------|
| Sr1  | 0          | 0.87344    | 0.99959    | 0.011               | 2a    | 0.82875 |
| Sr2  | 0          | 0.88448    | 0.36838    | 0.0108              | 2a    | 0.82875 |
| Si1  | 0.2475     | 0.33118    | 0.18524    | 0.0106              | 4b    | 0.82    |
| Si2  | 0          | 0.05404    | 0.67892    | 0.01                | 2a    | 0.82    |
| Si3  | 0          | 0.40191    | 0.90242    | 0.0149              | 2a    | 0.82    |
| Si4  | 0          | 0.42058    | 0.461      | 0.0117              | 2a    | 0.82    |
| N1   | 0.242(2)   | 0.9153(11) | 0.6732(31) | 0.0078              | 4b    | 0.775   |
| N2   | 0.2478(30) | 0.4449(15) | 0.0101(19) | 0.0109              | 4b    | 1       |
| N3   | 0          | 0.1753(22) | 0.8372(21) | 0.0109              | 2a    | 0.775   |
| N4   | 0          | 0.1913(21) | 0.5200(23) | 0.0039              | 2a    | 0.775   |
| N5   | 0          | 0.4237(24) | 0.2673(19) | 0.013               | 2a    | 1       |
| N6   | 0          | 0.5884(25) | 0.7725(19) | 0.0252              | 2a    | 1       |
| Eu1  | 0          | 0.87344    | 0.99959    | 0.011               | 2a    | 0.025   |
| Eu2  | 0          | 0.88448    | 0.36838    | 0.0108              | 2a    | 0.025   |
| Al1  | 0.2475     | 0.33118    | 0.18524    | 0.0106              | 4b    | 0.18    |
| Al2  | 0          | 0.05404    | 0.67892    | 0.01                | 2a    | 0.18    |
| Al3  | 0          | 0.40191    | 0.90242    | 0.0149              | 2a    | 0.18    |
| Al4  | 0          | 0.42058    | 0.461      | 0.0117              | 2a    | 0.18    |
| O1   | 0.242(2)   | 0.9153(11) | 0.6732(31) | 0.0078              | 4b    | 0.225   |
| O3   | 0          | 0.1753(22) | 0.8372(21) | 0.0109              | 2a    | 0.225   |
| O4   | 0          | 0.1913(21) | 0.5200(23) | 0.0039              | 2a    | 0.225   |
| Ca1  | 0          | 0.87344    | 0.99959    | 0.011               | 2a    | 0.14625 |
| Ca2  | 0          | 0.88448    | 0.36838    | 0.0108              | 2a    | 0.14625 |

|                       |                                                        |
|-----------------------|--------------------------------------------------------|
| <b>Formula sum</b>    | Sr <sub>2</sub> Si <sub>5</sub> N <sub>8</sub> :0.05Eu |
| <b>Formula weight</b> | 430.94 g/mol                                           |
| <b>Crystal system</b> | orthorhombic                                           |
| <b>Space-group</b>    | P m n 21 (31)                                          |

|                        |            |                                           |            |                          |              |              |
|------------------------|------------|-------------------------------------------|------------|--------------------------|--------------|--------------|
| <b>Cell parameters</b> |            | a=5.6900(1) Å b=6.7949(0) Å c=9.3030(1) Å |            |                          |              |              |
| <b>Cell ratio</b>      |            | a/b=0.8374 b/c=0.7304 c/a=1.6350          |            |                          |              |              |
| <b>Cell volume</b>     |            | 359.68(1) Å <sup>3</sup>                  |            |                          |              |              |
| <b>Z</b>               |            | 2                                         |            |                          |              |              |
| <b>Atom</b>            | <b>x/a</b> | <b>y/b</b>                                | <b>z/c</b> | <b>U [Å<sup>2</sup>]</b> | <b>Wyck.</b> | <b>Frac.</b> |
| Sr1                    | 0          | 0.87073                                   | 0.99912    | 0.0109                   | 2a           | 0.975        |
| Sr2                    | 0          | 0.88539                                   | 0.36848    | 0.0126                   | 2a           | 0.975        |
| Si1                    | 0.24783    | 0.334                                     | 0.1879     | 0.0141                   | 4b           | 1            |
| Si2                    | 0          | 0.05489                                   | 0.67759    | 0.0101                   | 2a           | 1            |
| Si3                    | 0          | 0.40416                                   | 0.90193    | 0.0102                   | 2a           | 1            |
| Si4                    | 0          | 0.42399                                   | 0.46116    | 0.0055                   | 2a           | 1            |
| N1                     | 0.2433     | 0.91192                                   | 0.67754    | 0.0133                   | 4b           | 1            |
| N2                     | 0.25801    | 0.44385                                   | 0.00947    | 0.0046                   | 4b           | 1            |
| N3                     | 0          | 0.17447                                   | 0.83812    | 0.0097                   | 2a           | 1            |
| N4                     | 0          | 0.18772                                   | 0.5224     | 0.0103                   | 2a           | 1            |
| N5                     | 0          | 0.42342                                   | 0.27202    | 0.0007                   | 2a           | 1            |
| N6                     | 0          | 0.58575                                   | 0.76965    | 0.0096                   | 2a           | 1            |
| Eu1                    | 0          | 0.87073                                   | 0.99912    | 0.0109                   | 2a           | 0.025        |
| Eu2                    | 0          | 0.88539                                   | 0.36848    | 0.0126                   | 2a           | 0.025        |

|                        |            |                                                                                               |            |                          |              |              |
|------------------------|------------|-----------------------------------------------------------------------------------------------|------------|--------------------------|--------------|--------------|
| <b>Formula sum</b>     |            | Sr <sub>2</sub> Si <sub>4.7</sub> Al <sub>0.3</sub> N <sub>7.7</sub> O <sub>0.3</sub> :0.05Eu |            |                          |              |              |
| <b>Formula weight</b>  |            | 431.21 g/mol                                                                                  |            |                          |              |              |
| <b>Crystal system</b>  |            | orthorhombic                                                                                  |            |                          |              |              |
| <b>Space-group</b>     |            | P m n 21 (31)                                                                                 |            |                          |              |              |
| <b>Cell parameters</b> |            | a=5.7078(1) Å b=6.7729(1) Å c=9.3568(2) Å                                                     |            |                          |              |              |
| <b>Cell ratio</b>      |            | a/b=0.8427 b/c=0.7239 c/a=1.6393                                                              |            |                          |              |              |
| <b>Cell volume</b>     |            | 361.72(1) Å <sup>3</sup>                                                                      |            |                          |              |              |
| <b>Z</b>               |            | 8                                                                                             |            |                          |              |              |
| <b>Atom</b>            | <b>x/a</b> | <b>y/b</b>                                                                                    | <b>z/c</b> | <b>U [Å<sup>2</sup>]</b> | <b>Wyck.</b> | <b>Frac.</b> |
| Sr1                    | 0          | 0.87252                                                                                       | 0.99799    | 0.0148                   | 2a           | 0.975        |
| Sr2                    | 0          | 0.87937                                                                                       | 0.36512    | 0.0244                   | 2a           | 0.975        |
| Si1                    | 0.24659    | 0.33182                                                                                       | 0.18043    | 0.024                    | 4b           | 0.9349       |
| Si2                    | 0          | 0.05407                                                                                       | 0.67717    | 0.0131                   | 2a           | 0.9451       |
| Si3                    | 0          | 0.40376                                                                                       | 0.90397    | 0.0119                   | 2a           | 0.97299      |
| Si4                    | 0          | 0.42109                                                                                       | 0.46022    | 0.0034                   | 2a           | 0.90701      |
| N1                     | 0.24705    | 0.91247                                                                                       | 0.67021    | 0.0016                   | 4b           | 0.925        |
| N2                     | 0.24762    | 0.44403                                                                                       | 0.00972    | 0.0011                   | 4b           | 1            |
| N3                     | 0          | 0.17072                                                                                       | 0.83607    | 0.0169                   | 2a           | 0.93559      |
| N4                     | 0          | 0.18897                                                                                       | 0.52118    | 0.0081                   | 2a           | 0.91442      |
| N5                     | 0          | 0.42853                                                                                       | 0.2692     | 0.0112                   | 2a           | 1            |
| N6                     | 0          | 0.58551                                                                                       | 0.77436    | 0.0155                   | 2a           | 1            |
| Eu1                    | 0          | 0.87252                                                                                       | 0.99799    | 0.0148                   | 2a           | 0.025        |
| Eu2                    | 0          | 0.87937                                                                                       | 0.36513    | 0.0244                   | 2a           | 0.025        |
| Al1                    | 0.24659    | 0.33182                                                                                       | 0.18043    | 0.024                    | 4b           | 0.05491      |
| Al2                    | 0          | 0.05407                                                                                       | 0.67716    | 0.0131                   | 2a           | 0.06509      |
| Al3                    | 0          | 0.40375                                                                                       | 0.90397    | 0.0119                   | 2a           | 0.02701      |
| Al4                    | 0          | 0.42109                                                                                       | 0.46022    | 0.0034                   | 2a           | 0.09299      |

|    |         |         |         |        |    |         |
|----|---------|---------|---------|--------|----|---------|
| O1 | 0.24705 | 0.91247 | 0.67021 | 0.0016 | 4b | 0.075   |
| O3 | 0       | 0.17072 | 0.83607 | 0.0169 | 2a | 0.06442 |
| O4 | 0       | 0.18897 | 0.52118 | 0.0081 | 2a | 0.08558 |

|                        |                                                                                               |  |  |  |  |  |
|------------------------|-----------------------------------------------------------------------------------------------|--|--|--|--|--|
| <b>Formula sum</b>     | Sr <sub>2</sub> Si <sub>4.4</sub> Al <sub>0.6</sub> N <sub>7.4</sub> O <sub>0.6</sub> :0.05Eu |  |  |  |  |  |
| <b>Formula weight</b>  | 431.47 g/mol                                                                                  |  |  |  |  |  |
| <b>Crystal system</b>  | orthorhombic                                                                                  |  |  |  |  |  |
| <b>Space-group</b>     | P m n 21 (31)                                                                                 |  |  |  |  |  |
| <b>Cell parameters</b> | a=5.7268(1) Å b=6.7473(1) Å c=9.4114(3) Å                                                     |  |  |  |  |  |
| <b>Cell ratio</b>      | a/b=0.8488 b/c=0.7169 c/a=1.6434                                                              |  |  |  |  |  |
| <b>Cell volume</b>     | 363.66(1) Å <sup>3</sup>                                                                      |  |  |  |  |  |
| <b>Z</b>               | 8                                                                                             |  |  |  |  |  |

| Atom | x/a     | y/b     | z/c     | U [Å <sup>2</sup> ] | Wyck. | Frac.   |
|------|---------|---------|---------|---------------------|-------|---------|
| Sr1  | 0       | 0.87305 | 0.99966 | 0.0102              | 2a    | 0.975   |
| Sr2  | 0       | 0.88386 | 0.36834 | 0.01                | 2a    | 0.975   |
| Si1  | 0.24772 | 0.33309 | 0.18604 | 0.01                | 4b    | 0.88016 |
| Si2  | 0       | 0.05469 | 0.68025 | 0.0103              | 2a    | 0.87984 |
| Si3  | 0       | 0.40344 | 0.9023  | 0.0101              | 2a    | 0.77866 |
| Si4  | 0       | 0.41979 | 0.46112 | 0.0096              | 2a    | 0.98134 |
| N1   | 0.24681 | 0.91239 | 0.67155 | 0.0097              | 4b    | 0.85    |
| N2   | 0.24836 | 0.44382 | 0.01067 | 0.0077              | 4b    | 1       |
| N3   | 0       | 0.17487 | 0.83803 | 0.0101              | 2a    | 0.90236 |
| N4   | 0       | 0.19164 | 0.52217 | 0.0095              | 2a    | 0.79764 |
| N5   | 0       | 0.42646 | 0.27071 | 0.0095              | 2a    | 1       |
| N6   | 0       | 0.58546 | 0.77325 | 0.0147              | 2a    | 1       |
| Eu1  | 0       | 0.87305 | 0.99966 | 0.0102              | 2a    | 0.025   |
| Eu2  | 0       | 0.88386 | 0.36834 | 0.01                | 2a    | 0.025   |
| Al1  | 0.24772 | 0.33309 | 0.18604 | 0.01                | 4b    | 0.12016 |
| Al2  | 0       | 0.05469 | 0.68025 | 0.0103              | 2a    | 0.11983 |
| Al3  | 0       | 0.40344 | 0.9023  | 0.0101              | 2a    | 0.22134 |
| Al4  | 0       | 0.41979 | 0.46112 | 0.0096              | 2a    | 0.01866 |
| O1   | 0.24681 | 0.91239 | 0.67155 | 0.0097              | 4b    | 0.15    |
| O3   | 0       | 0.17487 | 0.83803 | 0.0101              | 2a    | 0.09764 |
| O4   | 0       | 0.19164 | 0.52217 | 0.0095              | 2a    | 0.20235 |

| <b>Formula sum</b>     | Sr <sub>2</sub> Si <sub>4.1</sub> Al <sub>0.9</sub> N <sub>7.1</sub> O <sub>0.9</sub> :0.05Eu |         |         |                     |       |       |
|------------------------|-----------------------------------------------------------------------------------------------|---------|---------|---------------------|-------|-------|
| <b>Formula weight</b>  | 431.74 g/mol                                                                                  |         |         |                     |       |       |
| <b>Crystal system</b>  | orthorhombic                                                                                  |         |         |                     |       |       |
| <b>Space-group</b>     | P m n 21 (31)                                                                                 |         |         |                     |       |       |
| <b>Cell parameters</b> | a=5.7488(2) Å b=6.7227(1) Å c=9.4603(3) Å                                                     |         |         |                     |       |       |
| <b>Cell ratio</b>      | a/b=0.8551 b/c=0.7106 c/a=1.6456                                                              |         |         |                     |       |       |
| <b>Cell volume</b>     | 365.61(2) Å <sup>3</sup>                                                                      |         |         |                     |       |       |
| <b>Z</b>               | 8                                                                                             |         |         |                     |       |       |
| Atom                   | x/a                                                                                           | y/b     | z/c     | U [Å <sup>2</sup> ] | Wyck. | Frac. |
| Sr1                    | 0                                                                                             | 0.87311 | 0.99978 | 0.0102              | 2a    | 0.975 |
| Sr2                    | 0                                                                                             | 0.88377 | 0.36821 | 0.0103              | 2a    | 0.975 |

|     |         |         |         |        |    |       |
|-----|---------|---------|---------|--------|----|-------|
| Si1 | 0.24826 | 0.33249 | 0.18322 | 0.0099 | 4b | 0.82  |
| Si2 | 0       | 0.05475 | 0.67952 | 0.0106 | 2a | 0.82  |
| Si3 | 0       | 0.40207 | 0.90205 | 0.009  | 2a | 0.82  |
| Si4 | 0       | 0.4198  | 0.46093 | 0.0089 | 2a | 0.82  |
| N1  | 0.23952 | 0.91206 | 0.67534 | 0.0077 | 4b | 0.775 |
| N2  | 0.24037 | 0.44148 | 0.00754 | 0.0086 | 4b | 1     |
| N3  | 0       | 0.17356 | 0.83943 | 0.0095 | 2a | 0.775 |
| N4  | 0       | 0.19424 | 0.51918 | 0.0063 | 2a | 0.775 |
| N5  | 0       | 0.42444 | 0.26859 | 0.0072 | 2a | 1     |
| N6  | 0       | 0.59296 | 0.77833 | 0.0142 | 2a | 1     |
| Eu1 | 0       | 0.87311 | 0.99978 | 0.0102 | 2a | 0.025 |
| Eu2 | 0       | 0.88377 | 0.36821 | 0.0103 | 2a | 0.025 |
| Al1 | 0.24826 | 0.33249 | 0.18322 | 0.0099 | 4b | 0.18  |
| Al2 | 0       | 0.05475 | 0.67952 | 0.0106 | 2a | 0.18  |
| Al3 | 0       | 0.40207 | 0.90205 | 0.009  | 2a | 0.18  |
| Al4 | 0       | 0.4198  | 0.46093 | 0.0089 | 2a | 0.18  |
| O1  | 0.23952 | 0.91206 | 0.67534 | 0.0077 | 4b | 0.225 |
| O3  | 0       | 0.17356 | 0.83943 | 0.0095 | 2a | 0.225 |
| O4  | 0       | 0.19424 | 0.51918 | 0.0063 | 2a | 0.225 |

**Table S2** The amount of impurities in  $(\text{Sr}_{0.85}\text{Ba}_{0.15})_{1.95}\text{Si}_{4.1}\text{Al}_{0.9}\text{N}_{7.1}\text{O}_{0.9}:0.05\text{Eu}$ ,  $(\text{Sr}_{0.85}\text{Ca}_{0.15})_{1.95}\text{Si}_{4.1}\text{Al}_{0.9}\text{N}_{7.1}\text{O}_{0.9}:0.05\text{Eu}$  and  $\text{Sr}_{1.95}\text{Si}_{4.1}\text{Al}_{0.9}\text{N}_{7.1}\text{O}_{0.9}:0.05\text{Eu}$  from the results of Rietveld refinements.

| Impurity Phase                                                                                                      | $\text{Sr}_2\text{SiO}_4(\text{wt}\%)$ | $\text{Al}_2\text{SiO}_5(\text{wt}\%)$ |
|---------------------------------------------------------------------------------------------------------------------|----------------------------------------|----------------------------------------|
| $(\text{Sr}_{0.85}\text{Ba}_{0.15})_{1.95}\text{Si}_{4.1}\text{Al}_{0.9}\text{N}_{7.1}\text{O}_{0.9}:0.05\text{Eu}$ | 1.2                                    | 1.9                                    |
| $(\text{Sr}_{0.85}\text{Ca}_{0.15})_{1.95}\text{Si}_{4.1}\text{Al}_{0.9}\text{N}_{7.1}\text{O}_{0.9}:0.05\text{Eu}$ | 2.7                                    | 1.7                                    |
| $\text{Sr}_{1.95}\text{Si}_{4.1}\text{Al}_{0.9}\text{N}_{7.1}\text{O}_{0.9}:0.05\text{Eu}$                          | 11.2                                   | 2.9                                    |

**Figure S5** The particle size distribution of Ba-AlO-258 ( $\text{Sr}_{1.7}\text{Ba}_{0.3}\text{Si}_{5-x}\text{Al}_x\text{N}_{8-x}\text{O}_x:0.05\text{Eu}$ ) : (a-d)  $x=0, 0.3, 0.6, 0.9$

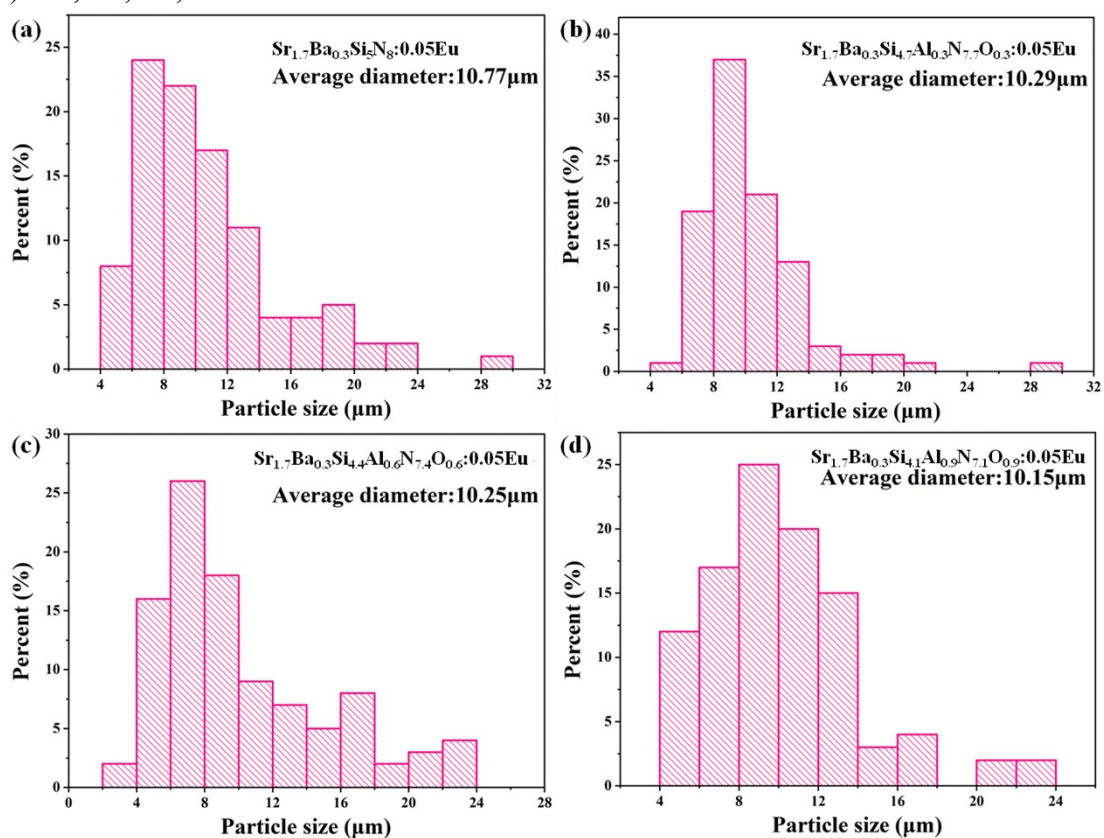

**Figure S6** The particle size distribution of Ca-AlO-258 ( $\text{Sr}_{1.7}\text{Ca}_{0.3}\text{Si}_{5-x}\text{Al}_x\text{N}_{8-x}\text{O}_x:0.05\text{Eu}$ ) : (a-d)  $x=0, 0.3, 0.6, 0.9$

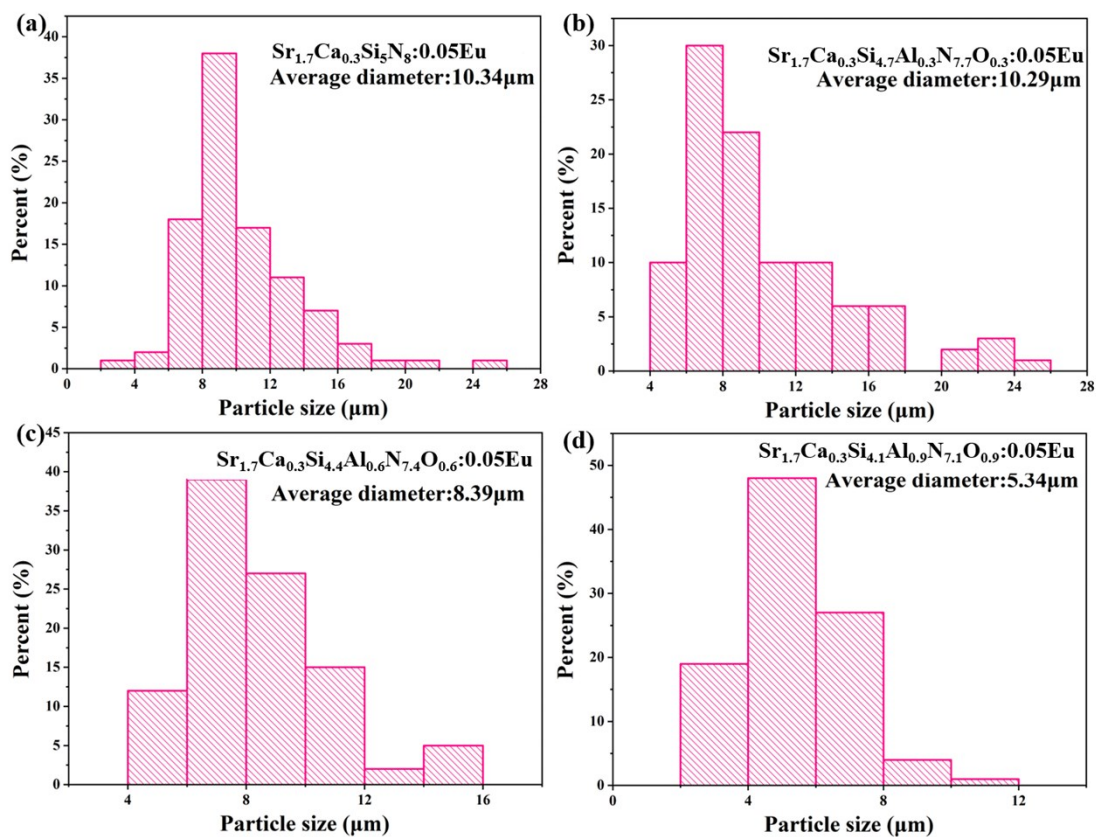

**Figure S7** The particle size distribution of AIO-258 ( $\text{Sr}_2\text{Si}_{5-x}\text{Al}_x\text{N}_{8-x}\text{O}_x:0.05\text{Eu}$ ) : (a-d)  $x=0, 0.3, 0.6, 0.9$

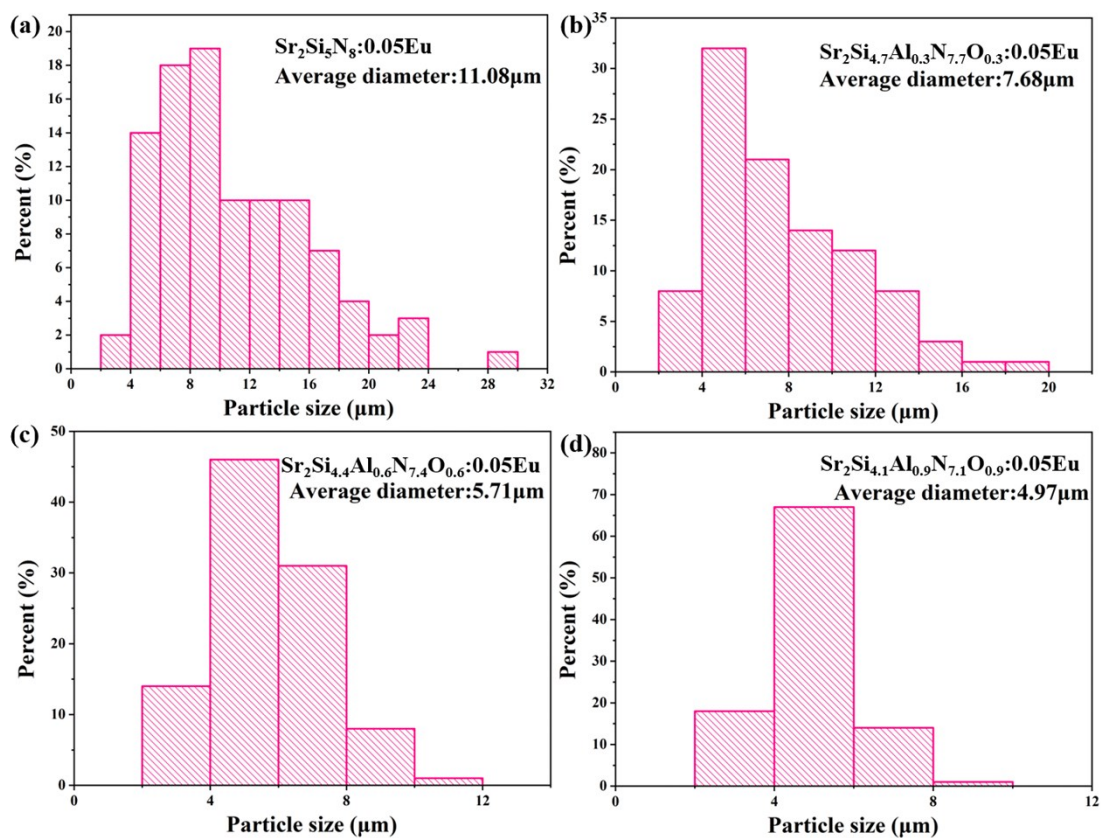

**Figure S8** (a) the PL relative intensity and (b) the internal quantum efficiency of the three series. It can be seen that in the three series, the PL intensity of each series decreases with the increasing content of  $(\text{AlO})^+$  substitution i.e.  $x$ . Among them, the decrease of PL intensity of Ba-AlO-258 series is relatively small; that of Ca-AlO-258 series when  $x \leq 0.3$  is relatively small, and that of Ca-AlO-258 series when  $x > 0.3$  is relatively large; that of AlO-258 series is relatively large. The change of PL intensity of each series with the increasing  $x$  is related to the change of its crystallinity. Compared with the single substitution of  $(\text{AlO})^+$ , the increase of crystallinity by co-substitution of  $\text{Ba}^{2+}$ - $(\text{AlO})^+$  and  $\text{Ca}^{2+}$ - $(\text{AlO})^+$  ( $x \leq 0.3$ ) thus can increase the PL intensity.

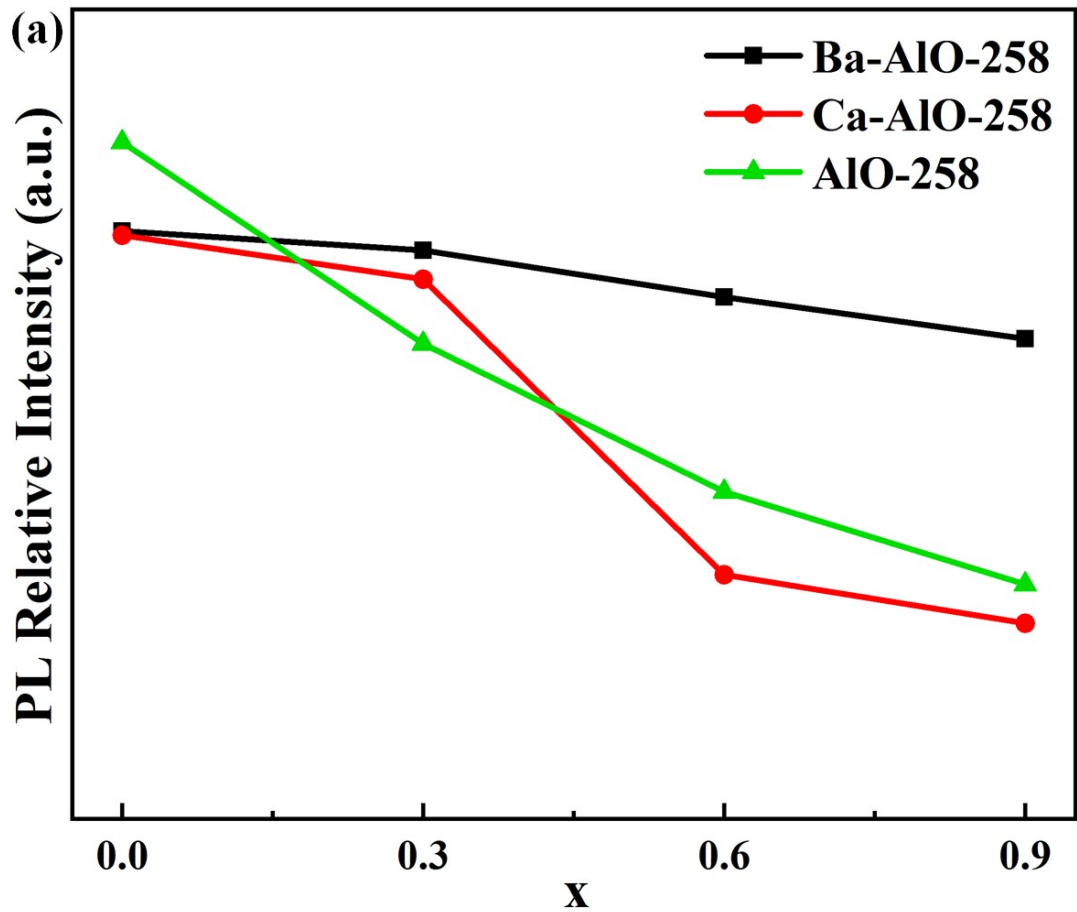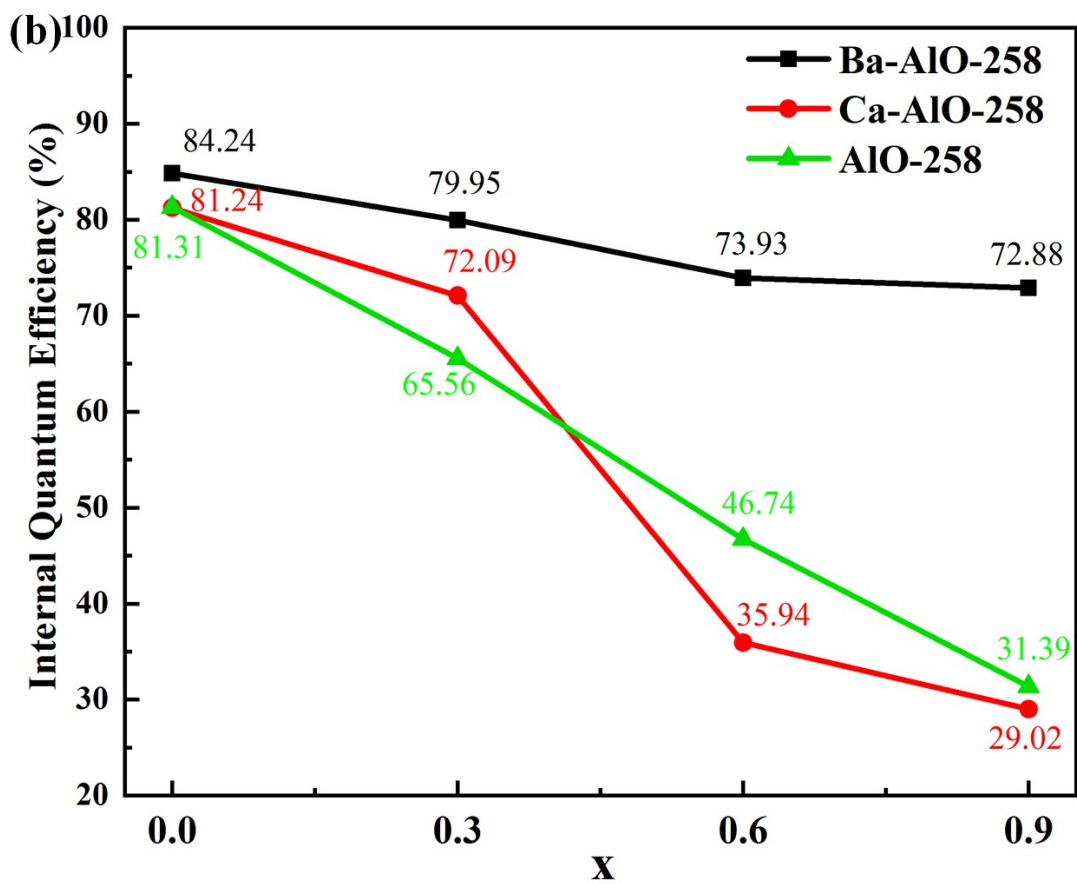



**Table S3** Absorption of three series. The absorption of the three series of samples are very close, so the external quantum efficiency has the same change trend with the internal quantum efficiency. With the increasing content of (AlO)<sup>+</sup> substitution i.e. x, the change of quantum efficiency of the each series is consistent with the change of PL relative intensity.

|                |       |       |       |       |
|----------------|-------|-------|-------|-------|
| Ba-AlO-258     | x=0   | x=0.3 | x=0.6 | x=0.9 |
| Absorption (%) | 57.53 | 61.12 | 63.38 | 59.89 |
| Ca-AlO-258     | x=0   | x=0.3 | x=0.6 | x=0.9 |
| Absorption (%) | 63.67 | 57.43 | 61.56 | 59.11 |
| AlO-258        | x=0   | x=0.3 | x=0.6 | x=0.9 |
| Absorption (%) | 61.16 | 60.91 | 58.83 | 56.64 |

**Figure S9** Temperature-dependent PL spectra of different kinds of substituted samples : no ion substituted samples ,Ba<sup>2+</sup>, Ca<sup>2+</sup>,AlO<sup>+</sup> single substituted samples , Ba<sup>2+</sup>-AlO<sup>+</sup> co-

substituted and  $\text{Ca}^{2+}$ - $\text{AlO}^+$  co-substituted samples.

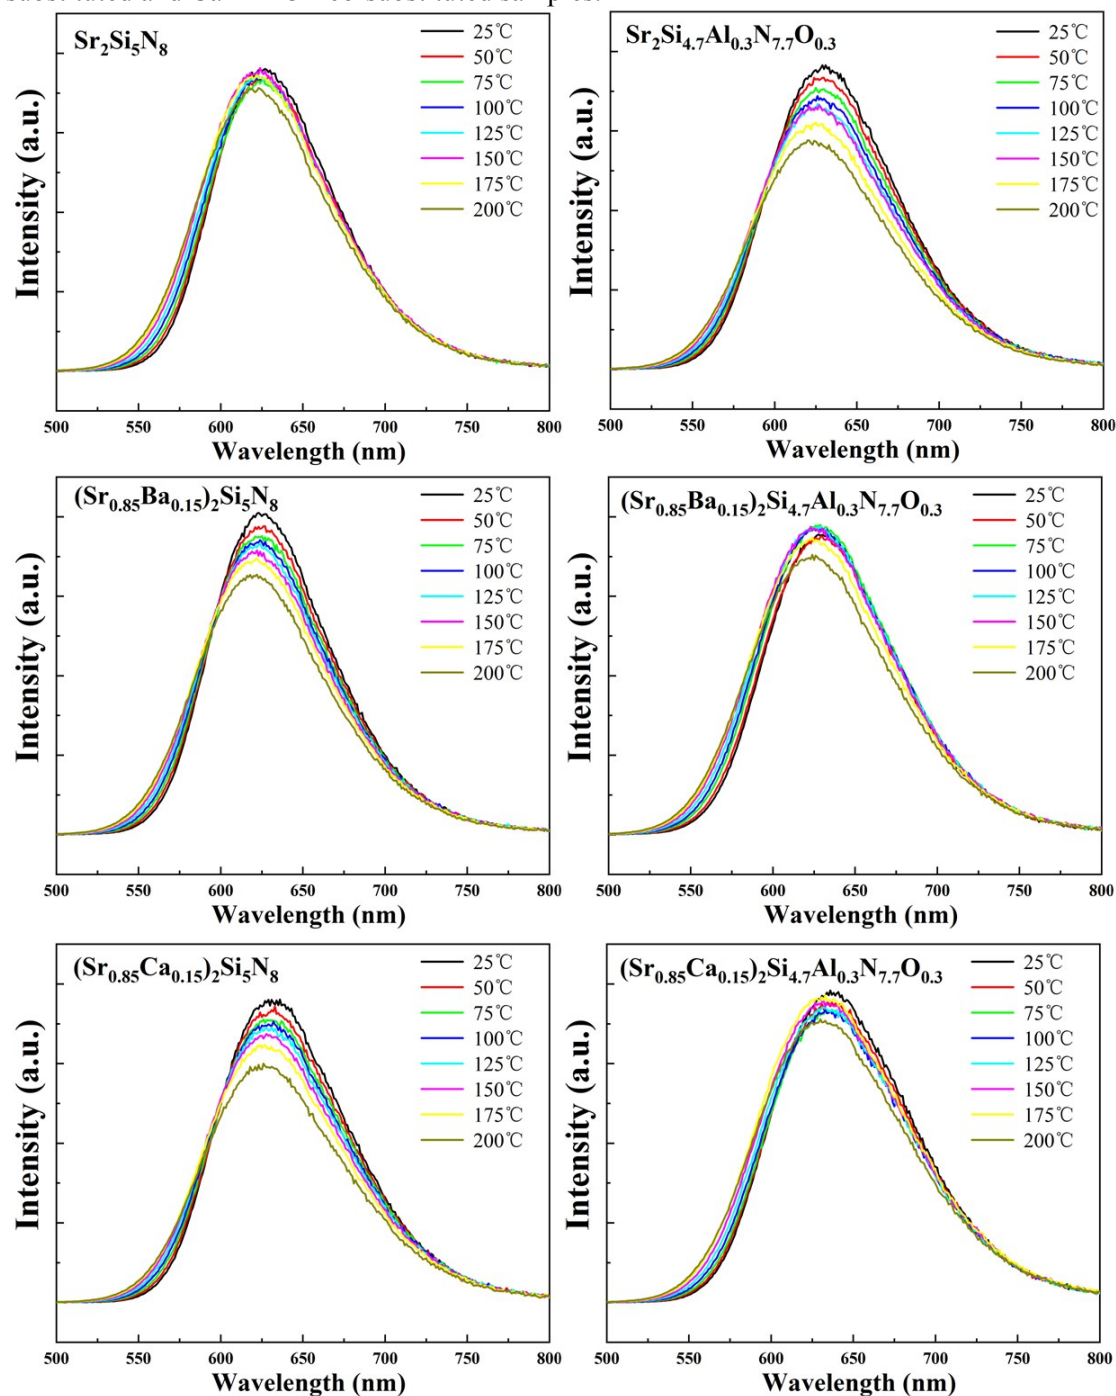

**Figure S10** The fluorescence decay curves at room temperature of all samples in the three series: (a)Ba-AlO-258:  $x=0, 0.3, 0.6, 0.9$ ; (b)Ca-AlO-258:  $x=0, 0.3, 0.6, 0.9$ ; (c) AlO-258:  $x=0, 0.3, 0.6, 0.9$ . It can be seen that in the three series, with the increase of the content of  $(\text{AlO})^+$  substitution, the fluorescence decay time decreases. This shows that the substitution of  $(\text{AlO})^+$  has the same effect on the local coordination environment of  $\text{Eu}^{2+}$  in three series.

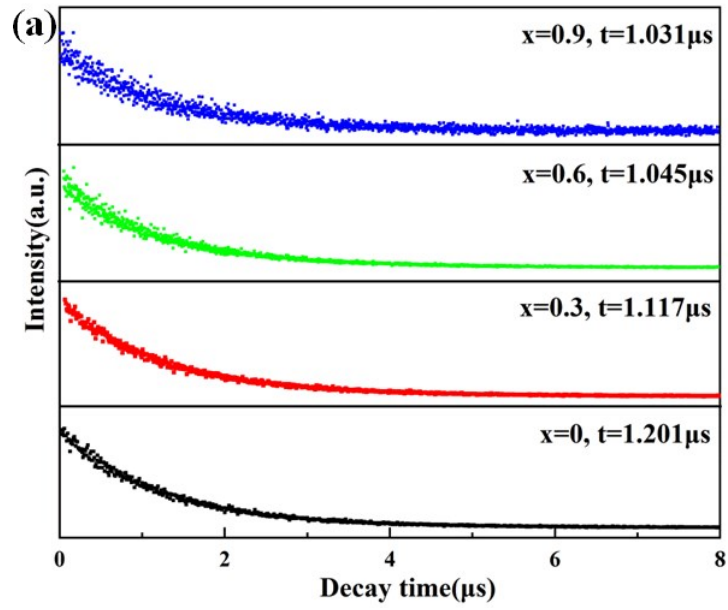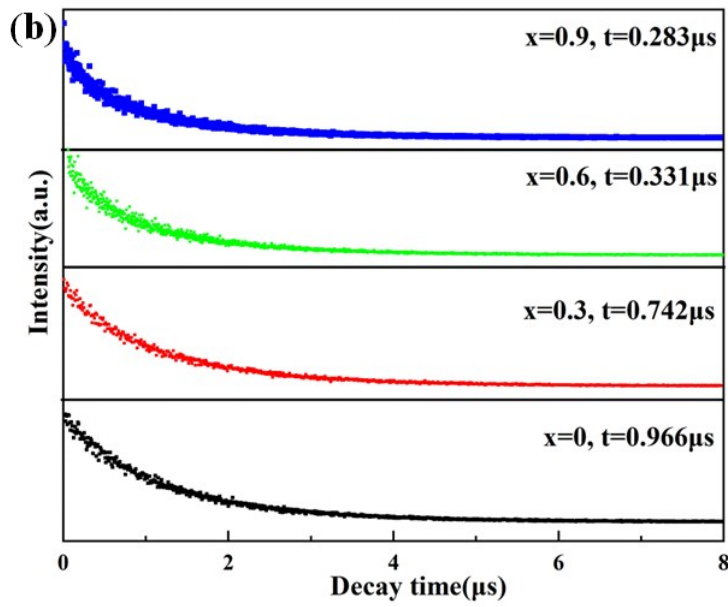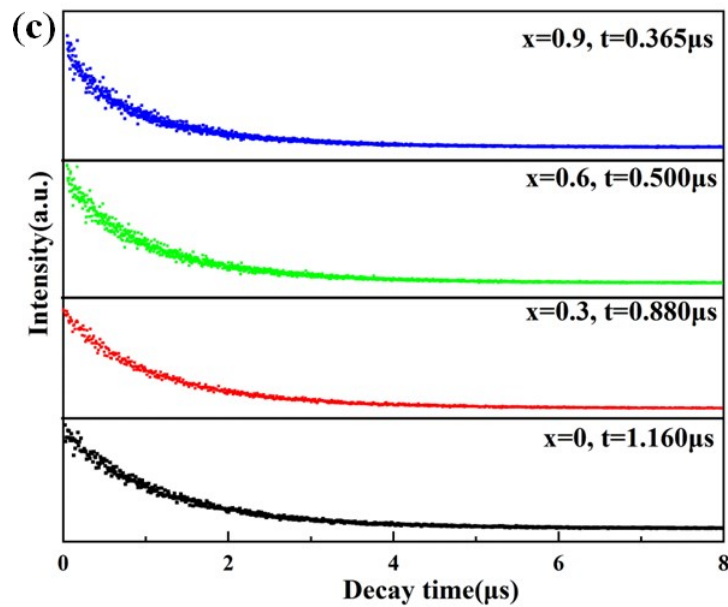

**Figure S11** the X-ray diffraction patterns of the phosphors of  $(\text{Sr}_{1-X}\text{Ba}_X)_2\text{Si}_{4.7}\text{Al}_{0.3}\text{N}_{7.7}\text{O}_{0.3}:\text{Eu}^{2+}$ ,  $X=0.30,0.45,0.60$ . With the increase of the substitution of  $\text{Ba}^{2+}$ , the diffraction peaks in XRD shift to a smaller angle, proving that the lattice expands, indicating that a substitution of  $\text{Ba}^{2+}$  for  $\text{Sr}^{2+}$  enters the lattice and the substitution content increases gradually. When the substitution content of  $\text{Ba}^{2+}$  is 0.30 or more, the impurities of  $\text{BaSi}_4\text{O}_9$  and  $\text{Al}_2\text{SiO}_5$  appear, but the content is very small.

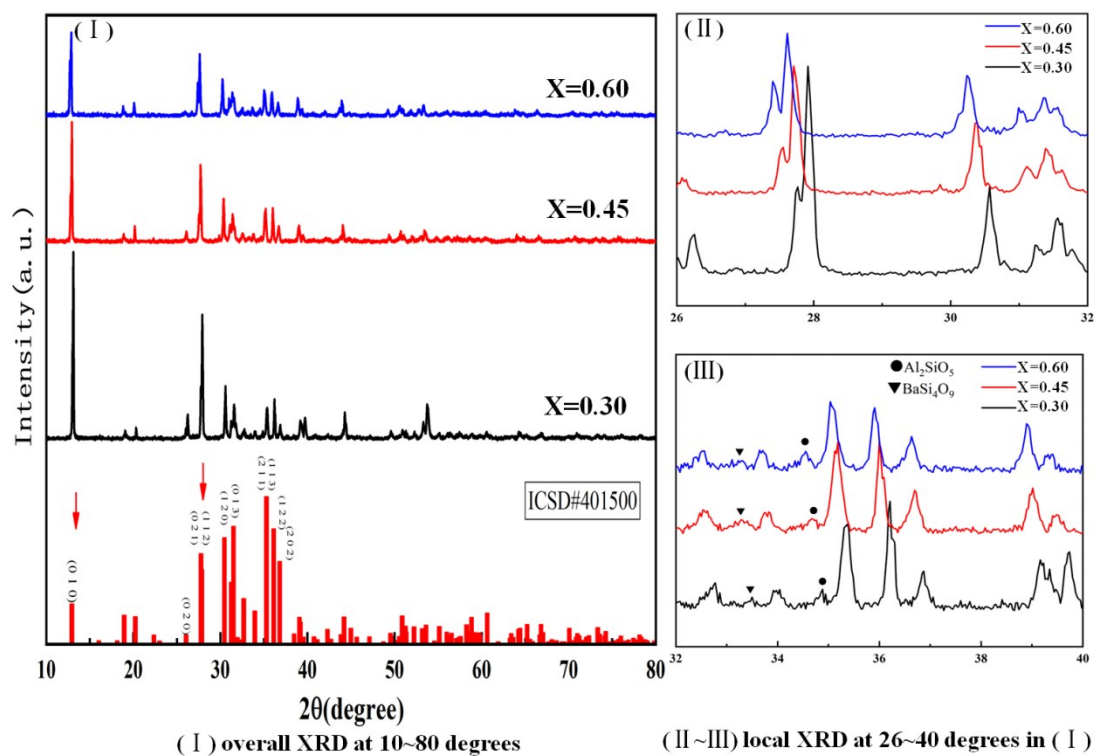

**Figure S12** the X-ray diffraction patterns of the phosphors of  $(\text{Sr}_{1-X}\text{Ca}_X)_2\text{Si}_{4.7}\text{Al}_{0.3}\text{N}_{7.7}\text{O}_{0.3}:\text{Eu}^{2+}$ ,  $X=0.30,0.45,0.60$ . With the increase of the substitution of  $\text{Ca}^{2+}$ , the diffraction peaks in XRD shift to a larger angle, proving that the lattice shrinks, indicating that a substitution of  $\text{Ca}^{2+}$  for  $\text{Sr}^{2+}$  enters the lattice and the substitution content increases gradually. When the substitution content of  $\text{Ca}^{2+}$  is 0.60 or more, the impurities of  $\text{Ca}_3\text{Al}_2\text{O}_6$  appear, and the content is small.

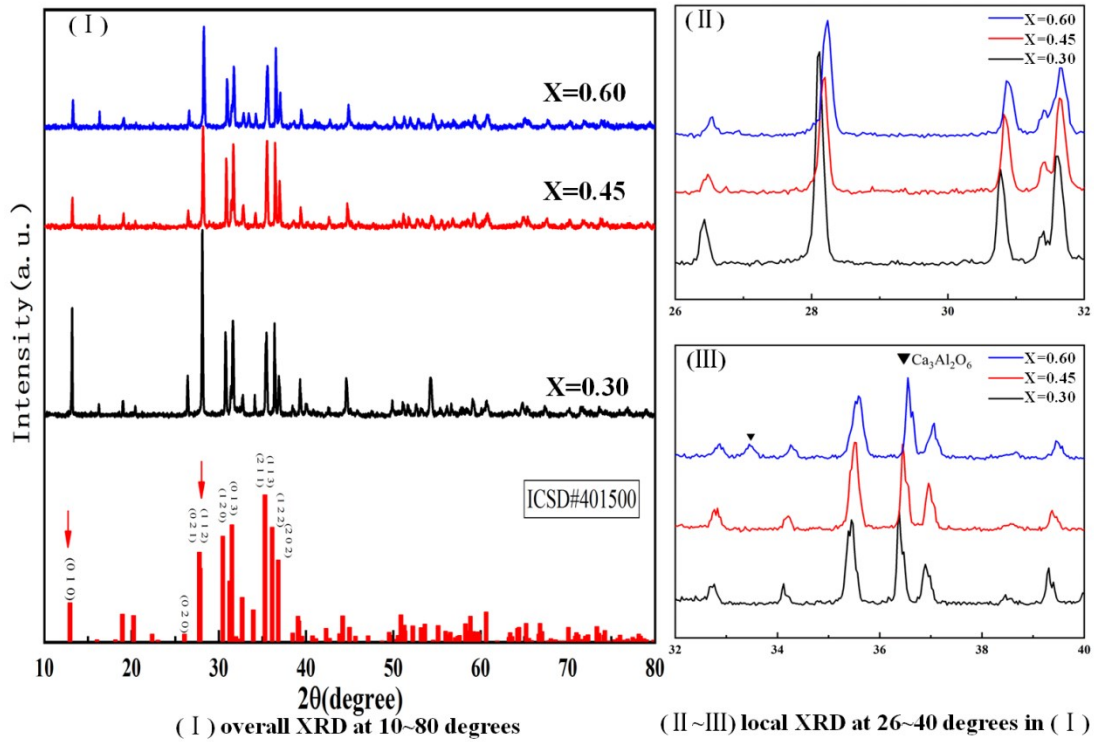

**Figure S13** Photoluminescence of the two series: (a)  $(\text{Sr}_{1-x}\text{Ba}_x)_2\text{Si}_{4.7}\text{Al}_{0.3}\text{N}_{7.7}\text{O}_{0.3}:\text{Eu}^{2+}$ ,  $X=0.30, 0.45, 0.60$ ; (b)  $(\text{Sr}_{1-x}\text{Ca}_x)_2\text{Si}_{4.7}\text{Al}_{0.3}\text{N}_{7.7}\text{O}_{0.3}:\text{Eu}^{2+}$ ,  $X=0.30, 0.45, 0.60$ . With the increase of the substitution of  $\text{Ba}^{2+}$ , the emission peak position shifted to blue, which was consistent with that in  $(\text{Sr}_{1-x}\text{Ba}_x)_2\text{Si}_5\text{N}_8:\text{Eu}^{2+}$  without  $(\text{AlO})^+$  substitution<sup>1</sup>. With the increase of  $\text{Ca}^{2+}$  substitution, the emission peak redshift is consistent with that in  $(\text{Sr}_{1-x}\text{Ca}_x)_2\text{Si}_5\text{N}_8:\text{Eu}^{2+}$  without  $(\text{AlO})^+$  substitution<sup>2</sup>.  $\text{Ba}^{2+}$  replaces  $\text{Sr}^{2+}$  into the lattice, which expands the lattice, makes the average bond length longer, and the crystal field splitting decreases, so as to cause the blue shift of the spectrum. In the same way,  $\text{Ca}^{2+}$  replaces  $\text{Sr}^{2+}$  into the lattice, which shrinks the lattice, makes the average bond length shorter, and the crystal field splitting increases, so as to cause the red shift of the spectrum.

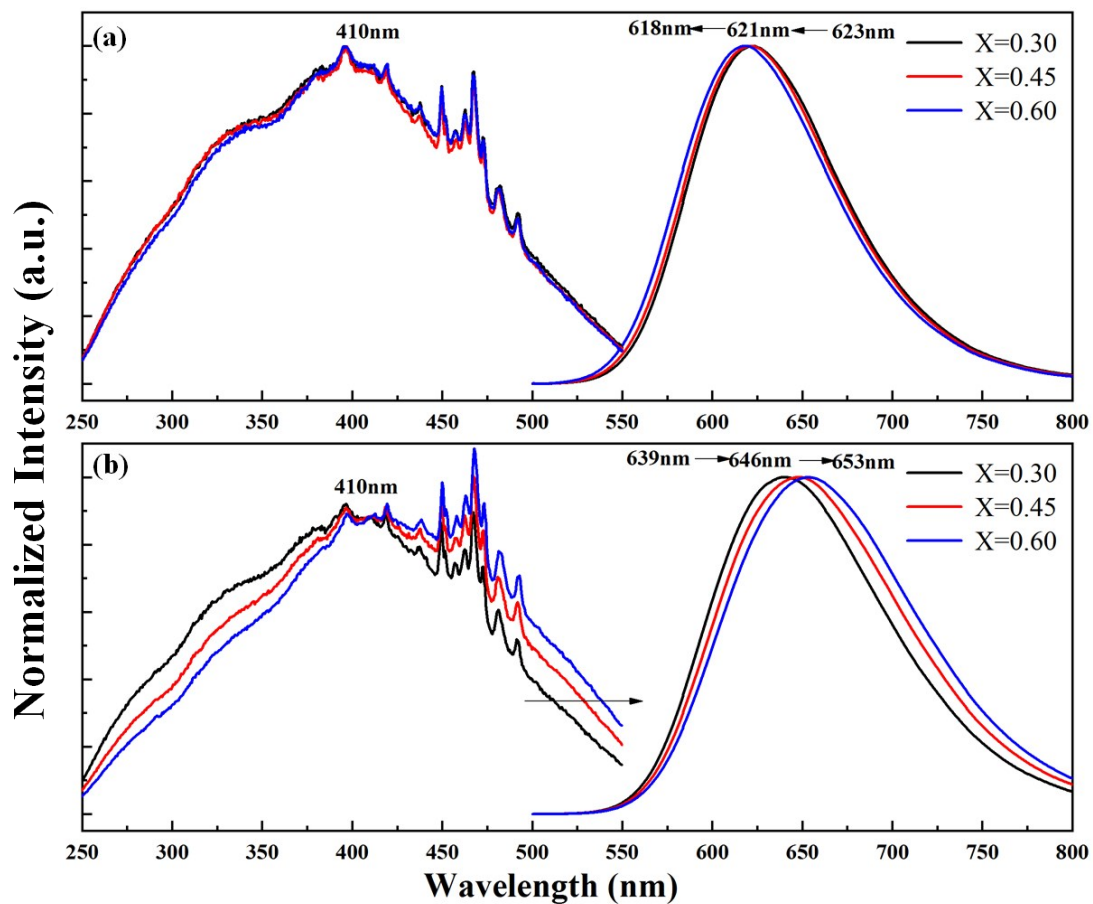

**Figure S14** The electroluminescence (EL) spectra of the WLED lamps fabricated by coating commercial green (LuAG:Ce<sup>3+</sup>) phosphor and the three series phosphors on a 450nm blue LED chip.

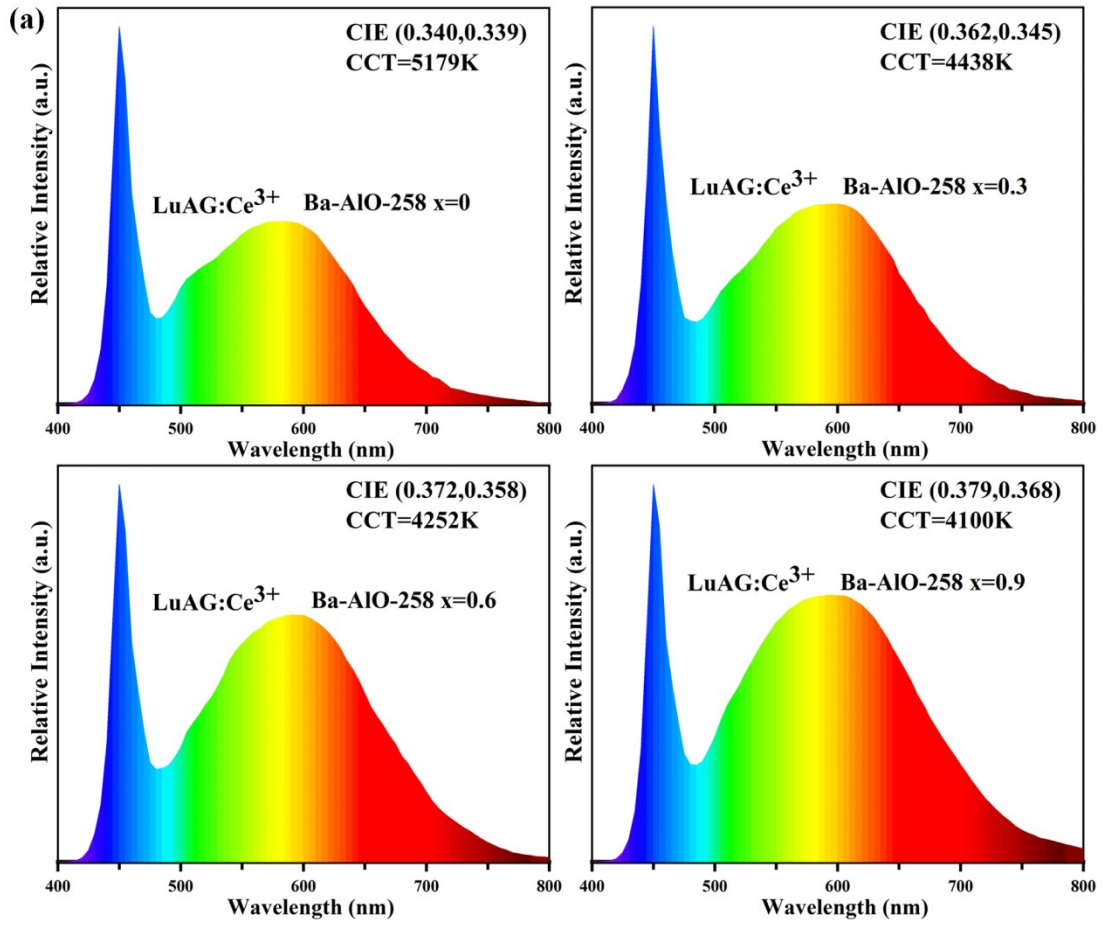

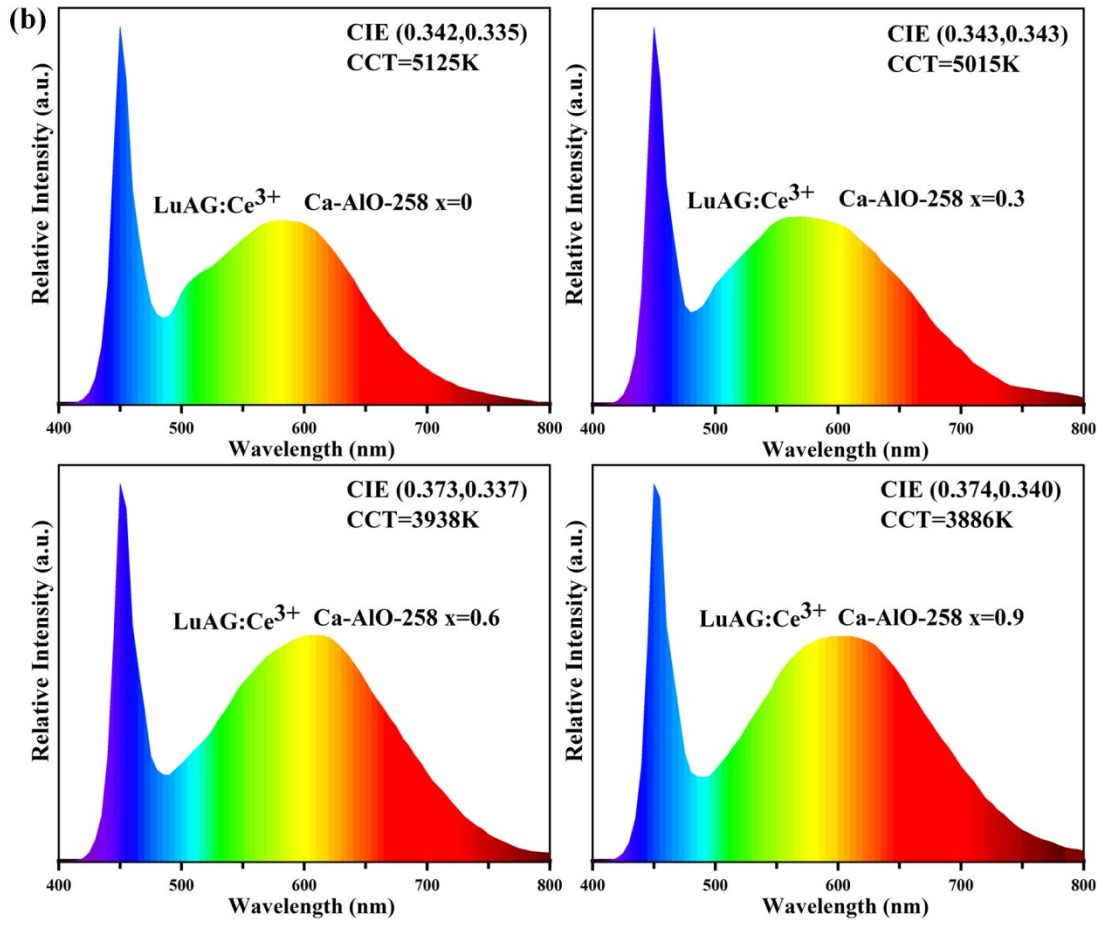



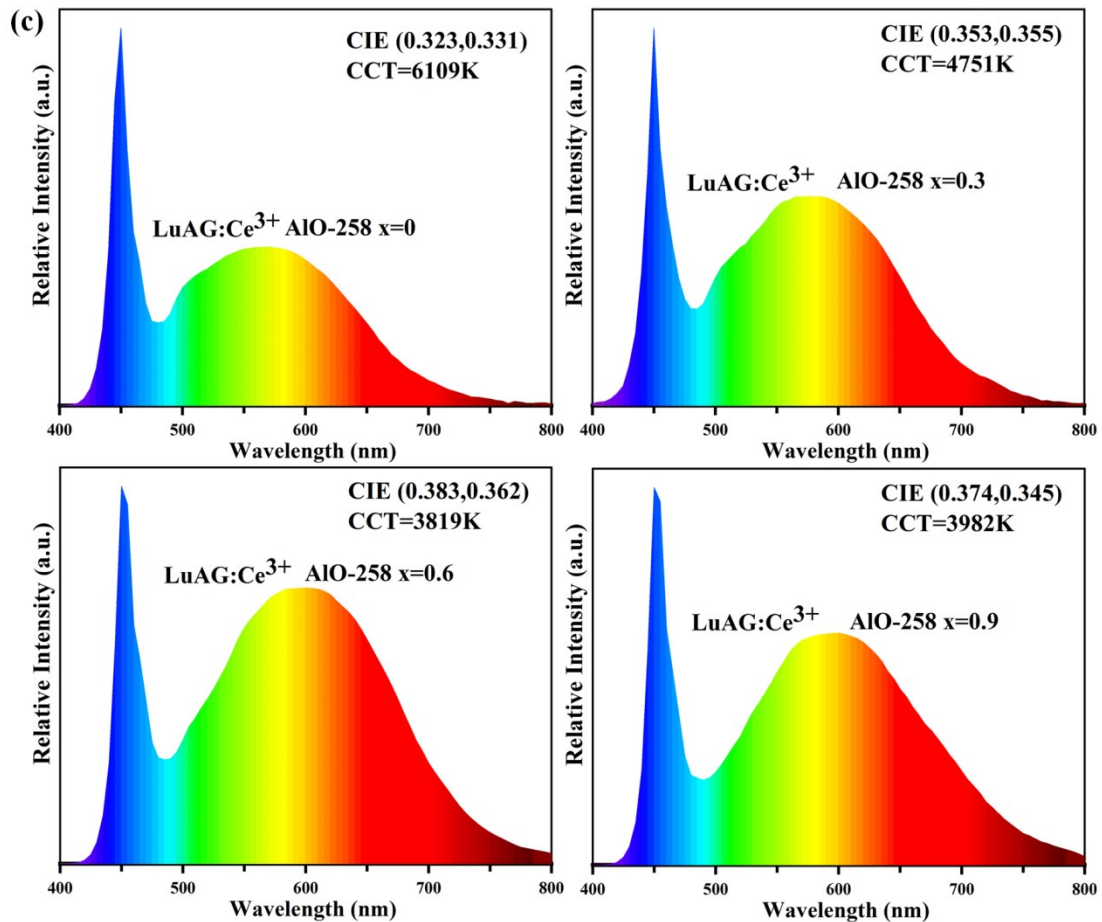

**Table S4** luminous efficiency and CRI of three series WLED lamps. With the increasing content of (AIO)<sup>+</sup> substitution i.e. x, the change of luminous efficiency of the each series is consistent with the change of quantum efficiency. With the increasing content of (AIO)<sup>+</sup> substitution i.e. x, the CRI of each series increases slightly due to the red shift of emission spectrum and the increase of FWHM.

|                            |        |       |       |       |
|----------------------------|--------|-------|-------|-------|
| Ba-AIO-258                 | x=0    | x=0.3 | x=0.6 | x=0.9 |
| luminous efficiency (lm/W) | 100.20 | 94.03 | 82.00 | 80.07 |
| Ra                         | 87.1   | 87.5  | 88.0  | 88.6  |
| Ca-AIO-258                 | x=0    | x=0.3 | x=0.6 | x=0.9 |
| luminous efficiency (lm/W) | 94.40  | 81.70 | 47.50 | 44.39 |
| Ra                         | 87.2   | 88.5  | 90.9  | 91.9  |
| AIO-258                    | x=0    | x=0.3 | x=0.6 | x=0.9 |
| luminous efficiency (lm/W) | 96.10  | 78.10 | 59.72 | 49.23 |
| Ra                         | 86.7   | 87.2  | 88.7  | 89.1  |

## Reference

1. Y. H. Liu, L. Chen, X. F. Zhou, R. H. Liu and W. D. Zhuang, *Journal of Solid State Chemistry*, 2017, **246**, 145-149.
2. X. Teng, Y. Liu, Y. Liu, H. Yunsheng, H. He and W. Zhuang, *Journal of Rare Earths*, 2009, **27**, 58-61.
